# Supplementary material
Source: PubMed Central journal article supplement (PMC4844773)
Supplement: NIHMS771282-supplement-Supp_Table_S1.pdf [file NIHMS771282-supplement-Supp_Table_S1.pdf]

**Weir et al. Supplementary Table 1.** Phosphotyrosine-containing peptides identified following expression of human SFKs in yeast following by anti-phosphotyrosine immunoprecipitation and peptide identification by LC-MS/MS. Peptide metrics include  $\Delta$ PPM of measured versus theoretical m/z of the precursor and SEQUEST cross-correlation score (XCorr). "." denotes the site of trypsin cleavage. "#" indicates phosphorylation. "\*" denotes oxidation. "Ascore Seq" denotes the preferred sequence of the peptide after considering phosphorylation site localization. Ascore1 and Ascore2 values are listed for peptides with one and two phosphorylation sites and the site number in the human protein is indicated. Ascores > 12 are considered unambiguous.

| Kinase | $\Delta$ PPM | XCorr | Peptide                               | Ascore Seq                        | Ascore 1 | Ascore 2 | Site 1 | Site 2 |
|--------|--------------|-------|---------------------------------------|-----------------------------------|----------|----------|--------|--------|
| Blk    | 0.64         | 4.242 | R.CLDEGGY#Y#ISPR.I                    | CLDEGGY#Y#ISPR                    | 88.3     | 51.6     | 187    | 188    |
| Blk    | 0.53         | 4.035 | R.CLDEGGY#Y#ISPR.I                    | CLDEGGY#Y#ISPR                    | 73.3     | 48.9     | 187    | 188    |
| Blk    | 0.68         | 4.432 | R.CLDEGGY#Y#ISPR.I                    | CLDEGGY#Y#ISPR                    | 32.4     | 0        | 187    | 0      |
| Blk    | 0.47         | 4.164 | R.CLDEGGY#Y#ISPR.I                    | CLDEGGY#Y#ISPR                    | 28.9     | 0        | 187    | 0      |
| Blk    | 0.47         | 4.005 | R.CLDEGGY#Y#ISPR.I                    | CLDEGGY#Y#ISPR                    | 32.4     | 0        | 187    | 0      |
| Blk    | 0.68         | 4.673 | R.CLDEGGY#Y#ISPR.I                    | CLDEGGY#Y#ISPR                    | 28.9     | 0        | 188    | 0      |
| Blk    | 0.47         | 4.543 | R.CLDEGGY#Y#ISPR.I                    | CLDEGGY#Y#ISPR                    | 28.9     | 0        | 188    | 0      |
| Blk    | -0.07        | 3.761 | R.CLDEGGY#Y#ISPR.I                    | CLDEGGY#Y#ISPR                    | 16.2     | 0        | 188    | 0      |
| Blk    | 0.68         | 4.241 | R.IIDSEY#TAQEGAK.F                    | IIDSEY#TAQEGAK                    | 16.2     | 0        | 389    | 0      |
| Blk    | -0.58        | 4.239 | R.IIDSEY#TAQEGAK.F                    | IIDSEY#TAQEGAK                    | 16.2     | 0        | 389    | 0      |
| Blk    | 1.5          | 4.138 | R.IIDSEY#TAQEGAK.F                    | IIDSEY#TAQEGAK                    | 16.2     | 0        | 389    | 0      |
| Blk    | -0.58        | 4.075 | R.IIDSEY#TAQEGAK.F                    | IIDSEY#TAQEGAK                    | 16.2     | 0        | 389    | 0      |
| Blk    | -0.41        | 3.683 | R.IIDSEY#TAQEGAK.F                    | IIDSEY#TAQEGAK                    | 16.2     | 0        | 389    | 0      |
| Blk    | -0.02        | 2.32  | R.KRGHLPAS#WK.L                       | KRGHLPAS#WK                       | 1000     | 0        | 622    | 0      |
| Blk    | -0.02        | 1.549 | R.KRGHLPAS#WK.L                       | KRGHLPAS#WK                       | 1000     | 0        | 622    | 0      |
| Blk    | -1.31        | 2.698 | R.LYAVVTKEPIY#IVTEY#MAR.G             | LYAVVTKEPIY#IVTEY#MAR             | 4.3      | 18       | 309    | 314    |
| Blk    | -1.31        | 2.36  | R.LYAVVTKEPIY#IVTEY#MAR.G             | LYAVVTKEPIY#IVTEY#MAR             | 15.4     | 31.3     | 309    | 314    |
| Fgr    | 0.47         | 3.216 | K.ARPASSFAHIPNYS#NFSSQAINPGFLDSGTIR.G | ARPASSFAHIPNYS#NFSSQAINPGFLDSGTIR | 11.5     | 0        | 45     | 0      |
| Fgr    | 0.48         | 4.756 | K.ARPASSFAHIPNYS#NFSSQAINPGFLDSGTIR.G | ARPASSFAHIPNYS#NFSSQAINPGFLDSGTIR | 0        | 0        | 54     | 0      |
| Fgr    | 0.85         | 4.47  | K.ARPASSFAHIPNYS#NFSSQAINPGFLDSGTIR.G | ARPASSFAHIPNYS#NFSSQAINPGFLDSGTIR | 0        | 0        | 54     | 0      |
| Fgr    | 0.85         | 4.198 | K.ARPASSFAHIPNYS#NFSSQAINPGFLDSGTIR.G | ARPASSFAHIPNYS#NFSSQAINPGFLDSGTIR | 3        | 0        | 54     | 0      |
| Fgr    | 2            | 4.129 | K.ARPASSFAHIPNYS#NFSSQAINPGFLDSGTIR.G | ARPASSFAHIPNYS#NFSSQAINPGFLDSGTIR | 9.1      | 0        | 57     | 0      |
| Fgr    | 1.54         | 4.021 | K.ARPASSFAHIPNYS#NFSSQAINPGFLDSGTIR.G | ARPASSFAHIPNYS#NFSSQAINPGFLDSGTIR | 0        | 0        | 57     | 0      |
| Fgr    | 0.8          | 6.267 | K.ARPASSFAHIPNYS#NFSSQAINPGFLDSGTIR.G | ARPASSFAHIPNYS#NFSSQAINPGFLDSGTIR | 6.4      | 0        | 53     | 0      |
| Fgr    | 0.85         | 6.178 | K.ARPASSFAHIPNYS#NFSSQAINPGFLDSGTIR.G | ARPASSFAHIPNYS#NFSSQAINPGFLDSGTIR | 8.6      | 0        | 53     | 0      |
| Fgr    | 0.8          | 5.775 | K.ARPASSFAHIPNYS#NFSSQAINPGFLDSGTIR.G | ARPASSFAHIPNYS#NFSSQAINPGFLDSGTIR | 9.8      | 0        | 53     | 0      |
| Fgr    | 0.76         | 5.758 | K.ARPASSFAHIPNYS#NFSSQAINPGFLDSGTIR.G | ARPASSFAHIPNYS#NFSSQAINPGFLDSGTIR | 9.8      | 0        | 53     | 0      |
| Fgr    | 0.82         | 5.603 | K.ARPASSFAHIPNYS#NFSSQAINPGFLDSGTIR.G | ARPASSFAHIPNYS#NFSSQAINPGFLDSGTIR | 14       | 0        | 53     | 0      |
| Fgr    | 1.32         | 4.862 | K.ARPASSFAHIPNYS#NFSSQAINPGFLDSGTIR.G | ARPASSFAHIPNYS#NFSSQAINPGFLDSGTIR | 8.6      | 0        | 53     | 0      |
| Fgr    | 1.32         | 4.665 | K.ARPASSFAHIPNYS#NFSSQAINPGFLDSGTIR.G | ARPASSFAHIPNYS#NFSSQAINPGFLDSGTIR | 0        | 0        | 54     | 0      |
| Fgr    | 0.86         | 4.604 | K.ARPASSFAHIPNYS#NFSSQAINPGFLDSGTIR.G | ARPASSFAHIPNYS#NFSSQAINPGFLDSGTIR | 0        | 0        | 54     | 0      |
| Fgr    | 1.9          | 3.847 | K.ARPASSFAHIPNYS#NFSSQAINPGFLDSGTIR.G | ARPASSFAHIPNYS#NFSSQAINPGFLDSGTIR | 10.3     | 0        | 53     | 0      |
| Fgr    | 1.84         | 3.799 | K.ARPASSFAHIPNYS#NFSSQAINPGFLDSGTIR.G | ARPASSFAHIPNYS#NFSSQAINPGFLDSGTIR | 10.3     | 0        | 53     | 0      |

|     |       |       |                                       |                                   |       |      |      |     |
|-----|-------|-------|---------------------------------------|-----------------------------------|-------|------|------|-----|
| Fgr | 1.68  | 3.762 | K.ARPASSFAHIPNYS#NFSSQAINPGFLDSGTIR.G | ARPASSFAHIPNYS#NFSSQAINPGFLDSGTIR | 0     | 0    | 57   | 0   |
| Fgr | 1.73  | 3.73  | K.ARPASSFAHIPNYS#NFSSQAINPGFLDSGTIR.G | ARPASSFAHIPNYS#NFSSQAINPGFLDSGTIR | 2.6   | 0    | 53   | 0   |
| Fgr | 0.39  | 3.495 | K.ARPASSFAHIPNYS#NFSSQAINPGFLDSGTIR.G | ARPASSFAHIPNYS#NFSSQAINPGFLDSGTIR | 0     | 0    | 54   | 0   |
| Fgr | 1.8   | 4.126 | K.ARPASSFAHIPNYS#NFSSQAINPGFLDSGTIR.G | ARPASSFAHIPNYS#NFSSQAINPGFLDSGTIR | 0     | 0    | 54   | 0   |
| Fgr | 0.14  | 4.104 | K.ASPETLSDQPWY#FSGVSR.T               | ASPETLSDQPWY#FSGVSR               | 48.9  | 0    | 121  | 0   |
| Fgr | 0.03  | 3.592 | K.ASPETLSDQPWY#FSGVSR.T               | ASPETLSDQPWY#FSGVSR               | 50.7  | 0    | 121  | 0   |
| Fgr | -3.23 | 2.831 | K.LAQQYVMTS#LQQEYKQM*LTAHALAVDAK.N    | LAQQYVMTS#LQQEYKQM*LTAHALAVDAK    | 9.4   | 0    | 1033 | 0   |
| Fgr | 0.07  | 3.549 | K.LDM*GGY#YITTR.V                     | LDM*GGY#YITTR                     | 0     | 0    | 208  | 0   |
| Fgr | 0.07  | 3.41  | K.LDM*GGY#YITTR.V                     | LDM*GGY#YITTR                     | 0     | 0    | 208  | 0   |
| Fgr | -0.04 | 3.379 | K.LDM*GGY#YITTR.V                     | LDM*GGY#YITTR                     | 0     | 0    | 208  | 0   |
| Fgr | 0.05  | 3.281 | K.LDM*GGY#YITTR.V                     | LDM*GGY#YITTR                     | 0     | 0    | 208  | 0   |
| Fgr | 0.17  | 2.291 | K.LDM*GGY#YITTR.V                     | LDM*GGY#YITTR                     | 0     | 0    | 208  | 0   |
| Fgr | 0.15  | 2.192 | K.LDM*GGY#YITTR.V                     | LDM*GGY#YITTR                     | 0     | 0    | 208  | 0   |
| Fgr | 0.3   | 3.851 | K.LDMGGY#YITTR.V                      | LDMGGY#YITTR                      | 38.4  | 0    | 208  | 0   |
| Fgr | 0.34  | 3.752 | K.LDMGGY#YITTR.V                      | LDMGGY#YITTR                      | 38.4  | 0    | 208  | 0   |
| Fgr | -0.25 | 5.029 | K.LEDYFETDSSY#SDANNFIR.-              | LEDYFETDSSY#SDANNFIR              | 33.7  | 0    | 497  | 0   |
| Fgr | -0.24 | 5.02  | K.LEDYFETDSSY#SDANNFIR.-              | LEDYFETDSSY#SDANNFIR              | 28.5  | 0    | 497  | 0   |
| Fgr | 0.33  | 4.499 | K.TGCIPSNY#VAPVDSIQAEWYFGK.I          | TGCIPSNY#VAPVDSIQAEWYFGK          | 3.3   | 0    | 132  | 0   |
| Fgr | 0.06  | 4.056 | K.TGCIPSNY#VAPVDSIQAEWY#FGKIGRK.D     | TGCIPSNY#VAPVDSIQAEWY#FGKIGRK     | 31.9  | 12.3 | 132  | 145 |
| Fgr | 1.82  | 3.812 | K.TGCIPSNY#VAPVDSIQAEWY#FGKIGRK.D     | TGCIPSNY#VAPVDSIQAEWY#FGKIGRK     | 33.3  | 14.4 | 132  | 145 |
| Fgr | 0.47  | 2.585 | K.TGCIPSNY#VAPVDSIQAEWY#FGKIGRK.D     | TGCIPSNY#VAPVDSIQAEWY#FGKIGRK     | 7     | 19.4 | 132  | 145 |
| Fgr | 0.33  | 4.583 | K.TGCIPSNY#VAPVDSIQAEWYFGK.I          | TGCIPSNY#VAPVDSIQAEWYFGK          | 3.4   | 0    | 132  | 0   |
| Fgr | 0.71  | 6.322 | K.TGCIPSNY#VAPVDSIQAEWY#FGK.I         | TGCIPSNY#VAPVDSIQAEWY#FGK         | 120.4 | 0    | 145  | 0   |
| Fgr | 0.7   | 5.944 | K.TGCIPSNY#VAPVDSIQAEWY#FGK.I         | TGCIPSNY#VAPVDSIQAEWY#FGK         | 158.4 | 0    | 145  | 0   |
| Fgr | 0.52  | 5.931 | K.TGCIPSNY#VAPVDSIQAEWY#FGK.I         | TGCIPSNY#VAPVDSIQAEWY#FGK         | 180.4 | 0    | 145  | 0   |
| Fgr | 0.52  | 5.571 | K.TGCIPSNY#VAPVDSIQAEWY#FGK.I         | TGCIPSNY#VAPVDSIQAEWY#FGK         | 94.3  | 0    | 145  | 0   |
| Fgr | 0.45  | 3.944 | K.TGCIPSNY#VAPVDSIQAEWY#FGKIGR.K      | TGCIPSNY#VAPVDSIQAEWY#FGKIGR      | 29.5  | 0    | 145  | 0   |
| Fgr | 0.51  | 3.921 | K.TGCIPSNY#VAPVDSIQAEWY#FGKIGR.K      | TGCIPSNY#VAPVDSIQAEWY#FGKIGR      | 33.3  | 0    | 145  | 0   |
| Fgr | 0.68  | 3.764 | K.TGCIPSNY#VAPVDSIQAEWY#FGKIGR.K      | TGCIPSNY#VAPVDSIQAEWY#FGKIGR      | 42.8  | 0    | 145  | 0   |
| Fgr | 0.5   | 3.72  | K.TGCIPSNY#VAPVDSIQAEWY#FGKIGR.K      | TGCIPSNY#VAPVDSIQAEWY#FGKIGR      | 26.3  | 0    | 145  | 0   |
| Fgr | 0.62  | 3.605 | K.TGCIPSNY#VAPVDSIQAEWY#FGKIGR.K      | TGCIPSNY#VAPVDSIQAEWY#FGKIGR      | 49    | 0    | 145  | 0   |
| Fgr | 0.52  | 3.523 | K.TGCIPSNY#VAPVDSIQAEWY#FGKIGR.K      | TGCIPSNY#VAPVDSIQAEWY#FGKIGR      | 71    | 0    | 145  | 0   |
| Fgr | 0.53  | 4.05  | K.TGCIPSNY#VAPVDSIQAEWY#FGKIGR.K.D    | TGCIPSNY#VAPVDSIQAEWY#FGKIGR      | 51.7  | 0    | 145  | 0   |
| Fgr | 0.65  | 4.049 | K.TGCIPSNY#VAPVDSIQAEWY#FGKIGR.K.D    | TGCIPSNY#VAPVDSIQAEWY#FGKIGR      | 30.1  | 0    | 145  | 0   |
| Fgr | 0.51  | 3.826 | K.TGCIPSNY#VAPVDSIQAEWY#FGKIGR.K.D    | TGCIPSNY#VAPVDSIQAEWY#FGKIGR      | 23.2  | 0    | 145  | 0   |
| Fgr | 0.56  | 3.69  | K.TGCIPSNY#VAPVDSIQAEWY#FGKIGR.K.D    | TGCIPSNY#VAPVDSIQAEWY#FGKIGR      | 30.1  | 0    | 145  | 0   |
| Fgr | -0.33 | 4.04  | R.KLDM*GGY#Y#ITTR.V                   | KLDM*GGY#Y#ITTR                   | 73.3  | 48.9 | 208  | 209 |
| Fgr | -0.06 | 3.808 | R.KLDM*GGY#Y#ITTR.V                   | KLDM*GGY#Y#ITTR                   | 68.6  | 45.7 | 208  | 209 |
| Fgr | -0.1  | 3.785 | R.KLDM*GGY#Y#ITTR.V                   | KLDM*GGY#Y#ITTR                   | 73.3  | 48.9 | 208  | 209 |

|     |       |       |                     |                  |       |       |     |     |
|-----|-------|-------|---------------------|------------------|-------|-------|-----|-----|
| Fgr | -0.06 | 3.762 | R.KLDM*GGY#Y#ITTR.V | KLDM*GGY#Y#ITTR  | 73.3  | 52.8  | 208 | 209 |
| Fgr | -0.3  | 3.72  | R.KLDM*GGY#Y#ITTR.V | KLDM*GGY#Y#ITTR  | 73.3  | 48.9  | 208 | 209 |
| Fgr | -0.05 | 3.707 | R.KLDM*GGY#Y#ITTR.V | KLDM*GGY#Y#ITTR  | 73.3  | 48.9  | 208 | 209 |
| Fgr | -0.59 | 3.575 | R.KLDM*GGY#Y#ITTR.V | KLDM*GGY#Y#ITTR  | 126.9 | 100.9 | 208 | 209 |
| Fgr | -0.49 | 3.545 | R.KLDM*GGY#Y#ITTR.V | KLDM*GGY#Y#ITTR  | 123.9 | 76.7  | 208 | 209 |
| Fgr | -0.58 | 3.519 | R.KLDM*GGY#Y#ITTR.V | KLDM*GGY#Y#ITTR  | 134.5 | 105.5 | 208 | 209 |
| Fgr | -0.51 | 3.516 | R.KLDM*GGY#Y#ITTR.V | KLDM*GGY#Y#ITTR  | 106.9 | 72.4  | 208 | 209 |
| Fgr | -1.09 | 3.166 | R.KLDM*GGY#Y#ITTR.V | KLDM*GGY#Y#ITTR  | 126.9 | 100.9 | 208 | 209 |
| Fgr | -0.5  | 2.777 | R.KLDM*GGY#Y#ITTR.V | KLDM*GGY#Y#ITTR  | 22    | 24.8  | 208 | 209 |
| Fgr | -0.97 | 2.708 | R.KLDM*GGY#Y#ITTR.V | KLDM*GGY#Y#ITTR  | 90.1  | 66.6  | 208 | 209 |
| Fgr | -0.16 | 2.668 | R.KLDM*GGY#Y#ITTR.V | KLDM*GGY#Y#ITTR  | 84.9  | 63.8  | 208 | 209 |
| Fgr | -0.06 | 2.612 | R.KLDM*GGY#Y#ITTR.V | KLDM*GGY#Y#ITTR  | 96.7  | 76.7  | 208 | 209 |
| Fgr | -0.48 | 2.43  | R.KLDM*GGY#Y#ITTR.V | KLDM*GGY#Y#ITTR  | 38.7  | 22    | 208 | 209 |
| Fgr | -0.46 | 2.325 | R.KLDM*GGY#Y#ITTR.V | KLDM*GGY#Y#ITTR  | 30.7  | 30.7  | 208 | 209 |
| Fgr | -0.46 | 2.007 | R.KLDM*GGY#Y#ITTR.V | KLDM*GGY#YITTR#R | 10.3  | 16.2  | 208 | 212 |
| Fgr | 0.5   | 3.902 | R.KLDM*GGY#YITTR.V  | KLDM*GGY#YITTR   | 64.8  | 0     | 208 | 0   |
| Fgr | 0.48  | 3.857 | R.KLDM*GGY#YITTR.V  | KLDM*GGY#YITTR   | 64.8  | 0     | 208 | 0   |
| Fgr | 0.48  | 3.541 | R.KLDM*GGY#YITTR.V  | KLDM*GGY#YITTR   | 64.8  | 0     | 208 | 0   |
| Fgr | 0.57  | 3.308 | R.KLDM*GGY#YITTR.V  | KLDM*GGY#YITTR   | 11.5  | 0     | 208 | 0   |
| Fgr | 0.5   | 3.143 | R.KLDM*GGY#YITTR.V  | KLDM*GGY#YITTR   | 38.4  | 0     | 208 | 0   |
| Fgr | 0.46  | 2.954 | R.KLDM*GGY#YITTR.V  | KLDM*GGY#YITTR   | 26.4  | 0     | 208 | 0   |
| Fgr | 0.43  | 2.721 | R.KLDM*GGY#YITTR.V  | KLDM*GGY#YITTR   | 6.5   | 0     | 208 | 0   |
| Fgr | -0.05 | 3.016 | R.KLDM*GGY#YITTR.V  | KLDM*GGY#YITTR   | 13.2  | 0     | 209 | 0   |
| Fgr | -0.03 | 4.123 | R.KLDMGGY#Y#ITTR.V  | KLDMGGY#Y#ITTR   | 64.5  | 43    | 208 | 209 |
| Fgr | -0.17 | 3.912 | R.KLDMGGY#Y#ITTR.V  | KLDMGGY#Y#ITTR   | 41.3  | 33.7  | 208 | 209 |
| Fgr | 0     | 3.881 | R.KLDMGGY#Y#ITTR.V  | KLDMGGY#Y#ITTR   | 58    | 38.7  | 208 | 209 |
| Fgr | -0.17 | 3.873 | R.KLDMGGY#Y#ITTR.V  | KLDMGGY#Y#ITTR   | 53.5  | 48.9  | 208 | 209 |
| Fgr | -0.27 | 3.825 | R.KLDMGGY#Y#ITTR.V  | KLDMGGY#Y#ITTR   | 148.2 | 92.2  | 208 | 209 |
| Fgr | -0.53 | 3.8   | R.KLDMGGY#Y#ITTR.V  | KLDMGGY#Y#ITTR   | 137.1 | 104.5 | 208 | 209 |
| Fgr | -0.29 | 3.689 | R.KLDMGGY#Y#ITTR.V  | KLDMGGY#Y#ITTR   | 46.3  | 26.5  | 208 | 209 |
| Fgr | -0.35 | 3.638 | R.KLDMGGY#Y#ITTR.V  | KLDMGGY#Y#ITTR   | 46.3  | 43    | 208 | 209 |
| Fgr | -0.27 | 3.547 | R.KLDMGGY#Y#ITTR.V  | KLDMGGY#Y#ITTR   | 148.2 | 92.2  | 208 | 209 |
| Fgr | -0.42 | 3.514 | R.KLDMGGY#Y#ITTR.V  | KLDMGGY#Y#ITTR   | 96.7  | 65    | 208 | 209 |
| Fgr | -0.07 | 3.03  | R.KLDMGGY#Y#ITTR.V  | KLDMGGY#Y#ITTR   | 22    | 28.5  | 208 | 209 |
| Fgr | -0.42 | 3     | R.KLDMGGY#Y#ITTR.V  | KLDMGGY#Y#ITTR   | 103   | 63.8  | 208 | 209 |
| Fgr | -0.53 | 2.842 | R.KLDMGGY#Y#ITTR.V  | KLDMGGY#Y#ITTR   | 96.7  | 55.1  | 208 | 209 |
| Fgr | -0.17 | 4.397 | R.KLDMGGY#YITTR.V   | KLDMGGY#YITTR    | 38.4  | 0     | 208 | 0   |
| Fgr | -0.19 | 4.337 | R.KLDMGGY#YITTR.V   | KLDMGGY#YITTR    | 28.9  | 0     | 208 | 0   |
| Fgr | -0.17 | 4.327 | R.KLDMGGY#YITTR.V   | KLDMGGY#YITTR    | 32.4  | 0     | 208 | 0   |

|     |       |       |                          |                      |       |      |     |    |
|-----|-------|-------|--------------------------|----------------------|-------|------|-----|----|
| Fgr | 0.41  | 4.273 | R.KLDMGGY#YITTR.V        | KLDMGGY#YITTR        | 32.4  | 0    | 208 | 0  |
| Fgr | -0.25 | 4.252 | R.KLDMGGY#YITTR.V        | KLDMGGY#YITTR        | 32.4  | 0    | 208 | 0  |
| Fgr | -0.25 | 4.209 | R.KLDMGGY#YITTR.V        | KLDMGGY#YITTR        | 38.4  | 0    | 208 | 0  |
| Fgr | -0.19 | 4.052 | R.KLDMGGY#YITTR.V        | KLDMGGY#YITTR        | 32.4  | 0    | 208 | 0  |
| Fgr | 1.78  | 3.836 | R.KLDMGGY#YITTR.V        | KLDMGGY#YITTR        | 19.3  | 0    | 208 | 0  |
| Fgr | -0.47 | 3.535 | R.LHAVCSGGEPVY#IVTELMR.K | LHAVCSGGEPVY#IVTELMR | 17.6  | 0    | 299 | 0  |
| Fgr | 1.28  | 3.429 | R.LIKDDEY#NPCQGSK.F      | LIKDDEY#NPCQGSK      | 79.3  | 0    | 412 | 0  |
| Fgr | -0.01 | 3.246 | R.LIKDDEY#NPCQGSK.F      | LIKDDEY#NPCQGSK      | 57.8  | 0    | 412 | 0  |
| Fgr | -0.04 | 3.179 | R.LIKDDEY#NPCQGSK.F      | LIKDDEY#NPCQGSK      | 107.3 | 0    | 412 | 0  |
| Fgr | 0.21  | 5.203 | R.LIKDDEY#NPCQGSKFPIK.W  | LIKDDEY#NPCQGSKFPIK  | 88    | 0    | 412 | 0  |
| Fgr | 0.08  | 4.388 | R.LIKDDEY#NPCQGSKFPIK.W  | LIKDDEY#NPCQGSKFPIK  | 69    | 0    | 412 | 0  |
| Fgr | 0.21  | 4.174 | R.LIKDDEY#NPCQGSKFPIK.W  | LIKDDEY#NPCQGSKFPIK  | 37.8  | 0    | 412 | 0  |
| Fgr | -0.16 | 3.3   | R.LIKDDEY#NPCQGSKFPIK.W  | LIKDDEY#NPCQGSKFPIK  | 42.5  | 0    | 412 | 0  |
| Fgr | -0.68 | 4.057 | R.LLKDDIY#SPSSSSKIPVK.W  | LLKDDIY#SPSSSSKIPVK  | 24.8  | 0    | 380 | 0  |
| Fgr | 0.18  | 4.407 | R.SY#GAADHY#GPDPTK.A     | SY#GAADHY#GPDPTK     | 0     | 80.7 | 28  | 34 |
| Fgr | -0.02 | 3.409 | R.SY#GAADHY#GPDPTK.A     | SY#GAADHY#GPDPTK     | 14.5  | 65.7 | 28  | 34 |
| Fgr | -0.15 | 4.471 | R.SYGAADHY#GPDPTK.A      | SYGAADHY#GPDPTK      | 108.9 | 0    | 34  | 0  |
| Frk | 0.01  | 5.697 | K.LEDYFETDSS#YSDANNFIR.- | LEDYFETDSS#YSDANNFIR | 22.9  | 0    | 496 | 0  |
| Frk | 0.2   | 5.462 | K.LEDYFETDSS#YSDANNFIR.- | LEDYFETDSS#YSDANNFIR | 0     | 0    | 496 | 0  |
| Frk | 0.03  | 5.38  | K.LEDYFETDSS#YSDANNFIR.- | LEDYFETDSS#YSDANNFIR | 13.2  | 0    | 496 | 0  |
| Frk | 0.2   | 5.279 | K.LEDYFETDSS#YSDANNFIR.- | LEDYFETDSS#YSDANNFIR | 13.2  | 0    | 496 | 0  |
| Frk | 0.23  | 5.262 | K.LEDYFETDSS#YSDANNFIR.- | LEDYFETDSS#YSDANNFIR | 13.2  | 0    | 496 | 0  |
| Frk | -1.1  | 5.136 | K.LEDYFETDSS#YSDANNFIR.- | LEDYFETDSS#YSDANNFIR | 7.9   | 0    | 496 | 0  |
| Frk | -0.77 | 4.734 | K.LEDYFETDSS#YSDANNFIR.- | LEDYFETDSS#YSDANNFIR | 13.2  | 0    | 496 | 0  |
| Frk | -1.1  | 4.575 | K.LEDYFETDSS#YSDANNFIR.- | LEDYFETDSS#YSDANNFIR | 10.3  | 0    | 496 | 0  |
| Frk | 0     | 4.534 | K.LEDYFETDSS#YSDANNFIR.- | LEDYFETDSS#YSDANNFIR | 0     | 0    | 496 | 0  |
| Frk | -1.23 | 4.122 | K.LEDYFETDSS#YSDANNFIR.- | LEDYFETDSS#YSDANNFIR | 0     | 0    | 497 | 0  |
| Frk | 1.03  | 2.492 | K.LEDYFETDSS#YSDANNFIR.- | LEDYFETDSS#YSDANNFIR | 0     | 0    | 497 | 0  |
| Frk | 0.02  | 5.773 | K.LEDYFETDSS#YSDANNFIR.- | LEDYFETDSS#YSDANNFIR | 37.4  | 0    | 497 | 0  |
| Frk | -0.08 | 5.533 | K.LEDYFETDSS#YSDANNFIR.- | LEDYFETDSS#YSDANNFIR | 21.3  | 0    | 497 | 0  |
| Frk | 0.03  | 5.392 | K.LEDYFETDSS#YSDANNFIR.- | LEDYFETDSS#YSDANNFIR | 21.3  | 0    | 497 | 0  |
| Frk | 0.05  | 5.343 | K.LEDYFETDSS#YSDANNFIR.- | LEDYFETDSS#YSDANNFIR | 33.7  | 0    | 497 | 0  |
| Frk | -0.11 | 5.229 | K.LEDYFETDSS#YSDANNFIR.- | LEDYFETDSS#YSDANNFIR | 18.9  | 0    | 497 | 0  |
| Frk | -0.1  | 5.183 | K.LEDYFETDSS#YSDANNFIR.- | LEDYFETDSS#YSDANNFIR | 21.3  | 0    | 497 | 0  |
| Frk | -0.93 | 4.813 | K.LEDYFETDSS#YSDANNFIR.- | LEDYFETDSS#YSDANNFIR | 26.5  | 0    | 497 | 0  |
| Frk | -0.94 | 4.612 | K.LEDYFETDSS#YSDANNFIR.- | LEDYFETDSS#YSDANNFIR | 10.3  | 0    | 496 | 0  |
| Frk | -0.93 | 4.536 | K.LEDYFETDSS#YSDANNFIR.- | LEDYFETDSS#YSDANNFIR | 21.3  | 0    | 497 | 0  |
| Frk | -0.04 | 2.14  | K.QLLY#SENKTSFLIR.E      | QLLY#SENKTSFLIR      | 13.3  | 0    | 133 | 0  |
| Frk | -1.28 | 2.769 | R.ALY#SLALR.C            | ALY#SLALR            | 32.4  | 0    | 353 | 0  |

|     |       |       |                           |                       |       |   |     |   |
|-----|-------|-------|---------------------------|-----------------------|-------|---|-----|---|
| Frk | -1.3  | 2.586 | R.ALY#SLALR.C             | ALY#SLALR             | 32.4  | 0 | 353 | 0 |
| Frk | -1.32 | 2.475 | R.ALY#SLALR.C             | ALY#SLALR             | 32.4  | 0 | 353 | 0 |
| Frk | -0.38 | 3.435 | R.SDAEKQLLY#SENK.T        | SDAEKQLLY#SENK        | 38.4  | 0 | 132 | 0 |
| Frk | -0.37 | 3.415 | R.SDAEKQLLY#SENK.T        | SDAEKQLLY#SENK        | 38.4  | 0 | 132 | 0 |
| Frk | -0.37 | 3.391 | R.SDAEKQLLY#SENK.T        | SDAEKQLLY#SENK        | 38.4  | 0 | 132 | 0 |
| Frk | -0.01 | 3.113 | R.SDAEKQLLY#SENK.T        | SDAEKQLLY#SENK        | 38.4  | 0 | 132 | 0 |
| Frk | -0.01 | 2.97  | R.SDAEKQLLY#SENK.T        | SDAEKQLLY#SENK        | 38.4  | 0 | 132 | 0 |
| Frk | -0.82 | 4.883 | R.SDAEKQLLY#SENKTGSFLIR.E | SDAEKQLLY#SENKTGSFLIR | 37.4  | 0 | 132 | 0 |
| Frk | -0.87 | 4.319 | R.SDAEKQLLY#SENKTGSFLIR.E | SDAEKQLLY#SENKTGSFLIR | 26.5  | 0 | 132 | 0 |
| Frk | -0.82 | 4.304 | R.SDAEKQLLY#SENKTGSFLIR.E | SDAEKQLLY#SENKTGSFLIR | 24.8  | 0 | 132 | 0 |
| Fyn | -0.17 | 4.787 | K.FPIKWTAPEAALY#GR.F      | FPIKWTAPEAALY#GR      | 152.1 | 0 | 437 | 0 |
| Fyn | -0.17 | 4.7   | K.FPIKWTAPEAALY#GR.F      | FPIKWTAPEAALY#GR      | 181.4 | 0 | 437 | 0 |
| Fyn | -0.1  | 4.259 | K.FPIKWTAPEAALY#GR.F      | FPIKWTAPEAALY#GR      | 158   | 0 | 437 | 0 |
| Fyn | -0.18 | 4.244 | K.FPIKWTAPEAALY#GR.F      | FPIKWTAPEAALY#GR      | 152.1 | 0 | 437 | 0 |
| Fyn | 0.38  | 4.128 | K.FPIKWTAPEAALY#GR.F      | FPIKWTAPEAALY#GR      | 139.1 | 0 | 437 | 0 |
| Fyn | 0.16  | 4.069 | K.FPIKWTAPEAALY#GR.F      | FPIKWTAPEAALY#GR      | 147.6 | 0 | 437 | 0 |
| Fyn | 0.04  | 4.066 | K.FPIKWTAPEAALY#GR.F      | FPIKWTAPEAALY#GR      | 127.5 | 0 | 437 | 0 |
| Fyn | -0.01 | 4.045 | K.FPIKWTAPEAALY#GR.F      | FPIKWTAPEAALY#GR      | 139.1 | 0 | 437 | 0 |
| Fyn | -0.45 | 3.811 | K.FPIKWTAPEAALY#GR.F      | FPIKWTAPEAALY#GR      | 139.1 | 0 | 437 | 0 |
| Fyn | 0.41  | 3.756 | K.FPIKWTAPEAALY#GR.F      | FPIKWTAPEAALY#GR      | 127.5 | 0 | 437 | 0 |
| Fyn | -0.69 | 2.327 | K.GAY#SLSIR.D             | GAY#SLSIR             | 32.4  | 0 | 185 | 0 |
| Fyn | -0.17 | 2.257 | K.GAY#SLSIR.D             | GAY#SLSIR             | 32.4  | 0 | 185 | 0 |
| Fyn | -0.86 | 2.216 | K.GAY#SLSIR.D             | GAY#SLSIR             | 32.4  | 0 | 185 | 0 |
| Fyn | -0.69 | 2.16  | K.GAY#SLSIR.D             | GAY#SLSIR             | 32.4  | 0 | 185 | 0 |
| Fyn | -0.14 | 2.141 | K.GAY#SLSIR.D             | GAY#SLSIR             | 32.4  | 0 | 185 | 0 |
| Fyn | -0.69 | 2.126 | K.GAY#SLSIR.D             | GAY#SLSIR             | 32.4  | 0 | 185 | 0 |
| Fyn | -0.22 | 2.055 | K.GAY#SLSIR.D             | GAY#SLSIR             | 32.4  | 0 | 185 | 0 |
| Fyn | -0.5  | 3.563 | K.LDNGGY#YITTR.A          | LDNGGY#YITTR          | 38.4  | 0 | 213 | 0 |
| Fyn | -0.54 | 3.436 | K.LDNGGY#YITTR.A          | LDNGGY#YITTR          | 38.4  | 0 | 213 | 0 |
| Fyn | -0.5  | 3.418 | K.LDNGGY#YITTR.A          | LDNGGY#YITTR          | 38.4  | 0 | 213 | 0 |
| Fyn | -0.54 | 3.359 | K.LDNGGY#YITTR.A          | LDNGGY#YITTR          | 38.4  | 0 | 213 | 0 |
| Fyn | -0.5  | 3.254 | K.LDNGGY#YITTR.A          | LDNGGY#YITTR          | 38.4  | 0 | 213 | 0 |
| Fyn | -0.04 | 3.196 | K.LDNGGY#YITTR.A          | LDNGGY#YITTR          | 28.9  | 0 | 213 | 0 |
| Fyn | -0.58 | 3.045 | K.LDNGGY#YITTR.A          | LDNGGY#YITTR          | 38.4  | 0 | 213 | 0 |
| Fyn | -0.01 | 2.757 | K.LDNGGY#YITTR.A          | LDNGGY#YITTR          | 13.2  | 0 | 213 | 0 |
| Fyn | -0.35 | 2.664 | K.LDNGGY#YITTR.A          | LDNGGY#YITTR          | 38.4  | 0 | 213 | 0 |
| Fyn | -0.41 | 2.494 | K.LDNGGY#YITTR.A          | LDNGGY#YITTR          | 32.4  | 0 | 213 | 0 |
| Fyn | -0.43 | 2.413 | K.LDNGGY#YITTR.A          | LDNGGY#YITTR          | 16.2  | 0 | 213 | 0 |
| Fyn | -0.41 | 2.681 | K.LDNGGY#YITTR.A          | LDNGGY#YITTR          | 24.4  | 0 | 213 | 0 |

|     |       |       |                     |                 |       |   |     |   |
|-----|-------|-------|---------------------|-----------------|-------|---|-----|---|
| Fyn | 0.01  | 2.637 | K.LDNGGY#ITTR.A     | LDNGGY#YITTR    | 32.4  | 0 | 213 | 0 |
| Fyn | -0.33 | 3.249 | K.WTAPEAALY#GR.F    | WTAPEAALY#GR    | 102.7 | 0 | 437 | 0 |
| Fyn | -0.48 | 3.227 | K.WTAPEAALY#GR.F    | WTAPEAALY#GR    | 120   | 0 | 437 | 0 |
| Fyn | -0.43 | 3.213 | K.WTAPEAALY#GR.F    | WTAPEAALY#GR    | 63.1  | 0 | 437 | 0 |
| Fyn | -0.48 | 2.909 | K.WTAPEAALY#GR.F    | WTAPEAALY#GR    | 120   | 0 | 437 | 0 |
| Fyn | -0.45 | 2.766 | K.WTAPEAALY#GR.F    | WTAPEAALY#GR    | 97.6  | 0 | 437 | 0 |
| Fyn | -0.46 | 2.756 | K.WTAPEAALY#GR.F    | WTAPEAALY#GR    | 120   | 0 | 437 | 0 |
| Fyn | -0.47 | 2.569 | K.WTAPEAALY#GR.F    | WTAPEAALY#GR    | 120   | 0 | 437 | 0 |
| Fyn | -0.46 | 2.407 | K.WTAPEAALY#GR.F    | WTAPEAALY#GR    | 120   | 0 | 437 | 0 |
| Fyn | -0.9  | 3.047 | R.DGSLNQSSGY#R.Y    | DGSLNQSSGY#R    | 45.7  | 0 | 28  | 0 |
| Fyn | -0.74 | 3.007 | R.DGSLNQSSGY#R.Y    | DGSLNQSSGY#R    | 40.7  | 0 | 28  | 0 |
| Fyn | -0.92 | 2.926 | R.DGSLNQSSGY#R.Y    | DGSLNQSSGY#R    | 40.7  | 0 | 28  | 0 |
| Fyn | 0.02  | 2.325 | R.ESETTKGAY#SLSIR.D | ESETTKGAY#SLSIR | 8.7   | 0 | 185 | 0 |
| Fyn | -0.28 | 4.521 | R.KLDNGGY#YITTR.A   | KLDNGGY#YITTR   | 38.4  | 0 | 213 | 0 |
| Fyn | -0.28 | 4.36  | R.KLDNGGY#YITTR.A   | KLDNGGY#YITTR   | 32.4  | 0 | 213 | 0 |
| Fyn | -0.26 | 4.331 | R.KLDNGGY#YITTR.A   | KLDNGGY#YITTR   | 32.4  | 0 | 213 | 0 |
| Fyn | 0.39  | 3.923 | R.KLDNGGY#YITTR.A   | KLDNGGY#YITTR   | 38.4  | 0 | 213 | 0 |
| Fyn | 0.11  | 3.779 | R.KLDNGGY#YITTR.A   | KLDNGGY#YITTR   | 10.3  | 0 | 213 | 0 |
| Fyn | -0.28 | 3.512 | R.KLDNGGY#YITTR.A   | KLDNGGY#YITTR   | 24.4  | 0 | 213 | 0 |
| Fyn | 0.06  | 3.345 | R.KLDNGGY#ITTR.A    | KLDNGGY#ITTR    | 16.2  | 0 | 214 | 0 |
| Fyn | -0.05 | 3.689 | R.LIEDNEY#TAR.Q     | LIEDNEY#TAR     | 26.4  | 0 | 417 | 0 |
| Fyn | 1.34  | 3.553 | R.LIEDNEY#TAR.Q     | LIEDNEY#TAR     | 28.9  | 0 | 417 | 0 |
| Fyn | -0.49 | 3.524 | R.LIEDNEY#TAR.Q     | LIEDNEY#TAR     | 28.9  | 0 | 417 | 0 |
| Fyn | -1.24 | 3.512 | R.LIEDNEY#TAR.Q     | LIEDNEY#TAR     | 28.9  | 0 | 417 | 0 |
| Fyn | 0.48  | 3.5   | R.LIEDNEY#TAR.Q     | LIEDNEY#TAR     | 32.4  | 0 | 417 | 0 |
| Fyn | -0.02 | 3.489 | R.LIEDNEY#TAR.Q     | LIEDNEY#TAR     | 26.4  | 0 | 417 | 0 |
| Fyn | -0.5  | 3.485 | R.LIEDNEY#TAR.Q     | LIEDNEY#TAR     | 24.4  | 0 | 417 | 0 |
| Fyn | -1.27 | 3.478 | R.LIEDNEY#TAR.Q     | LIEDNEY#TAR     | 28.9  | 0 | 417 | 0 |
| Fyn | 1.39  | 3.474 | R.LIEDNEY#TAR.Q     | LIEDNEY#TAR     | 28.9  | 0 | 417 | 0 |
| Fyn | -0.01 | 3.471 | R.LIEDNEY#TAR.Q     | LIEDNEY#TAR     | 28.9  | 0 | 417 | 0 |
| Fyn | -1.23 | 3.459 | R.LIEDNEY#TAR.Q     | LIEDNEY#TAR     | 32.4  | 0 | 417 | 0 |
| Fyn | -0.42 | 3.459 | R.LIEDNEY#TAR.Q     | LIEDNEY#TAR     | 28.9  | 0 | 417 | 0 |
| Fyn | 0.77  | 3.458 | R.LIEDNEY#TAR.Q     | LIEDNEY#TAR     | 28.9  | 0 | 417 | 0 |
| Fyn | -0.63 | 3.457 | R.LIEDNEY#TAR.Q     | LIEDNEY#TAR     | 28.9  | 0 | 417 | 0 |
| Fyn | -0.19 | 3.455 | R.LIEDNEY#TAR.Q     | LIEDNEY#TAR     | 28.9  | 0 | 417 | 0 |
| Fyn | 0.21  | 3.439 | R.LIEDNEY#TAR.Q     | LIEDNEY#TAR     | 28.9  | 0 | 417 | 0 |
| Fyn | 0.77  | 3.425 | R.LIEDNEY#TAR.Q     | LIEDNEY#TAR     | 28.9  | 0 | 417 | 0 |
| Fyn | 0.74  | 3.415 | R.LIEDNEY#TAR.Q     | LIEDNEY#TAR     | 28.9  | 0 | 417 | 0 |
| Fyn | -1.27 | 3.412 | R.LIEDNEY#TAR.Q     | LIEDNEY#TAR     | 28.9  | 0 | 417 | 0 |

|     |       |       |                 |             |      |   |     |   |
|-----|-------|-------|-----------------|-------------|------|---|-----|---|
| Fyn | 0.22  | 3.409 | R.LIEDNEY#TAR.Q | LIEDNEY#TAR | 32.4 | 0 | 417 | 0 |
| Fyn | -0.48 | 3.398 | R.LIEDNEY#TAR.Q | LIEDNEY#TAR | 26.4 | 0 | 417 | 0 |
| Fyn | -0.42 | 3.394 | R.LIEDNEY#TAR.Q | LIEDNEY#TAR | 28.9 | 0 | 417 | 0 |
| Fyn | 0.02  | 3.387 | R.LIEDNEY#TAR.Q | LIEDNEY#TAR | 24.4 | 0 | 417 | 0 |
| Fyn | 0.48  | 3.378 | R.LIEDNEY#TAR.Q | LIEDNEY#TAR | 26.4 | 0 | 417 | 0 |
| Fyn | 0.75  | 3.367 | R.LIEDNEY#TAR.Q | LIEDNEY#TAR | 28.9 | 0 | 417 | 0 |
| Fyn | 1.8   | 3.359 | R.LIEDNEY#TAR.Q | LIEDNEY#TAR | 26.4 | 0 | 417 | 0 |
| Fyn | -0.07 | 3.344 | R.LIEDNEY#TAR.Q | LIEDNEY#TAR | 24.4 | 0 | 417 | 0 |
| Fyn | -0.16 | 3.334 | R.LIEDNEY#TAR.Q | LIEDNEY#TAR | 28.9 | 0 | 417 | 0 |
| Fyn | -1.15 | 3.327 | R.LIEDNEY#TAR.Q | LIEDNEY#TAR | 28.9 | 0 | 417 | 0 |
| Fyn | -0.63 | 3.231 | R.LIEDNEY#TAR.Q | LIEDNEY#TAR | 26.4 | 0 | 417 | 0 |
| Fyn | 0     | 3.229 | R.LIEDNEY#TAR.Q | LIEDNEY#TAR | 16.2 | 0 | 417 | 0 |
| Fyn | -1.27 | 3.226 | R.LIEDNEY#TAR.Q | LIEDNEY#TAR | 28.9 | 0 | 417 | 0 |
| Fyn | -0.42 | 3.221 | R.LIEDNEY#TAR.Q | LIEDNEY#TAR | 16.2 | 0 | 417 | 0 |
| Fyn | -0.08 | 3.216 | R.LIEDNEY#TAR.Q | LIEDNEY#TAR | 28.9 | 0 | 417 | 0 |
| Fyn | -0.63 | 3.207 | R.LIEDNEY#TAR.Q | LIEDNEY#TAR | 28.9 | 0 | 417 | 0 |
| Fyn | -0.04 | 3.204 | R.LIEDNEY#TAR.Q | LIEDNEY#TAR | 24.4 | 0 | 417 | 0 |
| Fyn | 0.03  | 3.178 | R.LIEDNEY#TAR.Q | LIEDNEY#TAR | 20.4 | 0 | 417 | 0 |
| Fyn | 1.48  | 3.146 | R.LIEDNEY#TAR.Q | LIEDNEY#TAR | 28.9 | 0 | 417 | 0 |
| Fyn | -0.5  | 3.131 | R.LIEDNEY#TAR.Q | LIEDNEY#TAR | 16.2 | 0 | 417 | 0 |
| Fyn | -0.41 | 3.122 | R.LIEDNEY#TAR.Q | LIEDNEY#TAR | 28.9 | 0 | 417 | 0 |
| Fyn | -0.21 | 3.096 | R.LIEDNEY#TAR.Q | LIEDNEY#TAR | 26.4 | 0 | 417 | 0 |
| Fyn | 0.02  | 3.082 | R.LIEDNEY#TAR.Q | LIEDNEY#TAR | 20.4 | 0 | 417 | 0 |
| Fyn | -0.5  | 3.077 | R.LIEDNEY#TAR.Q | LIEDNEY#TAR | 42.6 | 0 | 417 | 0 |
| Fyn | -0.49 | 3.074 | R.LIEDNEY#TAR.Q | LIEDNEY#TAR | 16.2 | 0 | 417 | 0 |
| Fyn | -0.07 | 3.045 | R.LIEDNEY#TAR.Q | LIEDNEY#TAR | 32.4 | 0 | 417 | 0 |
| Fyn | -0.42 | 3.029 | R.LIEDNEY#TAR.Q | LIEDNEY#TAR | 21.5 | 0 | 417 | 0 |
| Fyn | -0.58 | 3.025 | R.LIEDNEY#TAR.Q | LIEDNEY#TAR | 32.4 | 0 | 417 | 0 |
| Fyn | -0.03 | 3.005 | R.LIEDNEY#TAR.Q | LIEDNEY#TAR | 16.2 | 0 | 417 | 0 |
| Fyn | -0.19 | 2.994 | R.LIEDNEY#TAR.Q | LIEDNEY#TAR | 26.4 | 0 | 417 | 0 |
| Fyn | -0.04 | 2.963 | R.LIEDNEY#TAR.Q | LIEDNEY#TAR | 22.9 | 0 | 417 | 0 |
| Fyn | 0.02  | 2.963 | R.LIEDNEY#TAR.Q | LIEDNEY#TAR | 16.2 | 0 | 417 | 0 |
| Fyn | -0.43 | 2.961 | R.LIEDNEY#TAR.Q | LIEDNEY#TAR | 16.2 | 0 | 417 | 0 |
| Fyn | -0.21 | 2.959 | R.LIEDNEY#TAR.Q | LIEDNEY#TAR | 16.2 | 0 | 417 | 0 |
| Fyn | -0.02 | 2.937 | R.LIEDNEY#TAR.Q | LIEDNEY#TAR | 16.2 | 0 | 417 | 0 |
| Fyn | -0.63 | 2.91  | R.LIEDNEY#TAR.Q | LIEDNEY#TAR | 16.2 | 0 | 417 | 0 |
| Fyn | -0.49 | 2.91  | R.LIEDNEY#TAR.Q | LIEDNEY#TAR | 42.6 | 0 | 417 | 0 |
| Fyn | -0.17 | 2.869 | R.LIEDNEY#TAR.Q | LIEDNEY#TAR | 26.4 | 0 | 417 | 0 |
| Fyn | -0.08 | 2.863 | R.LIEDNEY#TAR.Q | LIEDNEY#TAR | 28.9 | 0 | 417 | 0 |

|     |       |       |                     |                 |      |      |     |     |
|-----|-------|-------|---------------------|-----------------|------|------|-----|-----|
| Fyn | -0.5  | 2.85  | R.LIEDNEY#TAR.Q     | LIEDNEY#TAR     | 51.6 | 0    | 417 | 0   |
| Fyn | -0.63 | 2.809 | R.LIEDNEY#TAR.Q     | LIEDNEY#TAR     | 16.2 | 0    | 417 | 0   |
| Fyn | -0.05 | 2.779 | R.LIEDNEY#TAR.Q     | LIEDNEY#TAR     | 32.4 | 0    | 417 | 0   |
| Fyn | -0.01 | 2.756 | R.LIEDNEY#TAR.Q     | LIEDNEY#TAR     | 19.3 | 0    | 417 | 0   |
| Fyn | -1.27 | 2.715 | R.LIEDNEY#TAR.Q     | LIEDNEY#TAR     | 18.4 | 0    | 417 | 0   |
| Fyn | 1.39  | 2.703 | R.LIEDNEY#TAR.Q     | LIEDNEY#TAR     | 20.4 | 0    | 417 | 0   |
| Fyn | 1.34  | 2.691 | R.LIEDNEY#TAR.Q     | LIEDNEY#TAR     | 18.4 | 0    | 417 | 0   |
| Fyn | -0.15 | 2.674 | R.LIEDNEY#TAR.Q     | LIEDNEY#TAR     | 26.4 | 0    | 417 | 0   |
| Fyn | -1.27 | 2.621 | R.LIEDNEY#TAR.Q     | LIEDNEY#TAR     | 16.2 | 0    | 417 | 0   |
| Fyn | 1.33  | 2.617 | R.LIEDNEY#TAR.Q     | LIEDNEY#TAR     | 16.2 | 0    | 417 | 0   |
| Fyn | -0.18 | 2.607 | R.LIEDNEY#TAR.Q     | LIEDNEY#TAR     | 16.2 | 0    | 417 | 0   |
| Fyn | -0.63 | 2.568 | R.LIEDNEY#TAR.Q     | LIEDNEY#TAR     | 16.2 | 0    | 417 | 0   |
| Fyn | -0.19 | 2.453 | R.LIEDNEY#TAR.Q     | LIEDNEY#TAR     | 10.3 | 0    | 417 | 0   |
| Fyn | -0.7  | 2.024 | R.LIEDNEY#TAR.Q     | LIEDNEY#TAR     | 32.4 | 0    | 417 | 0   |
| Fyn | 0.03  | 1.919 | R.LIEDNEY#TAR.Q     | LIEDNEY#TAR     | 28.9 | 0    | 417 | 0   |
| Fyn | -0.47 | 1.747 | R.LIEDNEY#TAR.Q     | LIEDNEY#TAR     | 11.5 | 0    | 417 | 0   |
| Fyn | 0.04  | 4.314 | R.LIEDNEY#TARQGAK.F | LIEDNEY#TARQGAK | 13.2 | 0    | 417 | 0   |
| Fyn | -0.14 | 4.205 | R.LIEDNEY#TARQGAK.F | LIEDNEY#TARQGAK | 28.9 | 0    | 417 | 0   |
| Fyn | -0.14 | 4.062 | R.LIEDNEY#TARQGAK.F | LIEDNEY#TARQGAK | 13.2 | 0    | 417 | 0   |
| Fyn | -0.31 | 4.048 | R.LIEDNEY#TARQGAK.F | LIEDNEY#TARQGAK | 13.2 | 0    | 417 | 0   |
| Fyn | 0.04  | 3.647 | R.LIEDNEY#TARQGAK.F | LIEDNEY#TARQGAK | 16.2 | 0    | 417 | 0   |
| Fyn | 0.48  | 3.539 | R.LIEDNEY#TARQGAK.F | LIEDNEY#TARQGAK | 28.9 | 0    | 417 | 0   |
| Hck | 0.36  | 3.693 | R.TLDNNGGFY#ISPR.S  | TLDNNGGFY#ISPR  | 52.8 | 0    | 188 | 0   |
| Hck | 0.35  | 3.586 | R.TLDNNGGFY#ISPR.S  | TLDNNGGFY#ISPR  | 51.6 | 0    | 188 | 0   |
| Hck | 0.26  | 3.494 | R.TLDNNGGFY#ISPR.S  | TLDNNGGFY#ISPR  | 52.8 | 0    | 188 | 0   |
| Hck | 0.34  | 3.366 | R.TLDNNGGFY#ISPR.S  | TLDNNGGFY#ISPR  | 51.6 | 0    | 188 | 0   |
| Hck | 0.42  | 3.104 | R.TLDNNGGFY#ISPR.S  | TLDNNGGFY#ISPR  | 52.8 | 0    | 188 | 0   |
| Hck | 0.68  | 3.047 | R.TLDNNGGFY#ISPR.S  | TLDNNGGFY#ISPR  | 52.8 | 0    | 188 | 0   |
| Hck | -1.1  | 2.601 | R.TLDNNGGFY#ISPR.S  | TLDNNGGFY#ISPR  | 46.7 | 0    | 188 | 0   |
| Hck | 0.65  | 3.495 | R.VIEDNEY#TAREGAK.F | VIEDNEY#TAREGAK | 28.9 | 0    | 390 | 0   |
| Hck | -0.08 | 3.359 | R.VIEDNEY#TAREGAK.F | VIEDNEY#TAREGAK | 13.2 | 0    | 390 | 0   |
| Lyn | 0.15  | 2.403 | K.EGFIPSNY#VAK.L    | EGFIPSNY#VAK    | 33.7 | 0    | 96  | 0   |
| Lyn | -0.02 | 2.396 | K.EGFIPSNY#VAK.L    | EGFIPSNY#VAK    | 28.5 | 0    | 96  | 0   |
| Lyn | 0.16  | 2.264 | K.EGFIPSNY#VAK.L    | EGFIPSNY#VAK    | 17   | 0    | 96  | 0   |
| Lyn | 0.02  | 2.248 | K.EGFIPSNY#VAK.L    | EGFIPSNY#VAK    | 30.7 | 0    | 96  | 0   |
| Lyn | 0.17  | 2.243 | K.EGFIPSNY#VAK.L    | EGFIPSNY#VAK    | 30.8 | 0    | 96  | 0   |
| Lyn | -0.02 | 2.125 | K.EGFIPSNY#VAK.L    | EGFIPSNY#VAK    | 22   | 0    | 96  | 0   |
| Lyn | 0.44  | 2.262 | R.EEPIY#IITEY#MAK.G | EEPIY#IITEY#MAK | 64.5 | 23.3 | 295 | 300 |
| Lyn | 0.45  | 2.2   | R.EEPIY#IITEY#MAK.G | EEPIY#IITEY#MAK | 46.3 | 24.8 | 295 | 300 |

|     |       |       |                                     |                                 |       |   |     |   |
|-----|-------|-------|-------------------------------------|---------------------------------|-------|---|-----|---|
| Lyn | 0.64  | 2.792 | R.EEPIY#IITEYMAK.G                  | EEPIY#IITEYMAK                  | 22    | 0 | 295 | 0 |
| Lyn | 0.92  | 2.631 | R.EEPIY#IITEYMAK.G                  | EEPIY#IITEYMAK                  | 37.5  | 0 | 295 | 0 |
| Lyn | 0.74  | 2.34  | R.EEPIY#IITEYMAK.G                  | EEPIY#IITEYMAK                  | 73.3  | 0 | 295 | 0 |
| Lyn | 0.95  | 2.163 | R.EEPIY#IITEYMAK.G                  | EEPIY#IITEYMAK                  | 25.9  | 0 | 295 | 0 |
| Lyn | 1.01  | 2.157 | R.EEPIY#IITEYMAK.G                  | EEPIY#IITEYMAK                  | 30.7  | 0 | 295 | 0 |
| Lyn | -0.9  | 2.835 | R.FQTKDPEEQGDIVVALYPY#DGIHPDDLFSK.K | FQTKDPEEQGDIVVALYPY#DGIHPDDLFSK | 48.8  | 0 | 53  | 0 |
| Lyn | -0.51 | 1.935 | R.KRGHLVPAS#WK.L                    | KRGHLVPAS#WK                    | 1000  | 0 | 622 | 0 |
| Lyn | -0.51 | 1.91  | R.KRGHLVPAS#WK.L                    | KRGHLVPAS#WK                    | 1000  | 0 | 622 | 0 |
| Lyn | -0.7  | 2.827 | R.LIEDNEY#TAR.Q                     | LIEDNEY#TAR                     | 32.4  | 0 | 417 | 0 |
| Lyn | -0.93 | 2.493 | R.LY#AVVTR.E                        | LY#AVVTR                        | 104.5 | 0 | 285 | 0 |
| Lyn | -0.88 | 2.288 | R.LY#AVVTR.E                        | LY#AVVTR                        | 105.5 | 0 | 285 | 0 |
| Lyn | -1    | 2.238 | R.LY#AVVTR.E                        | LY#AVVTR                        | 115.5 | 0 | 285 | 0 |
| Lyn | -0.2  | 4.006 | R.SLDNGGY#YISPR.I                   | SLDNGGY#YISPR                   | 32.4  | 0 | 172 | 0 |
| Lyn | -0.2  | 3.972 | R.SLDNGGY#YISPR.I                   | SLDNGGY#YISPR                   | 32.4  | 0 | 172 | 0 |
| Lyn | -0.27 | 3.95  | R.SLDNGGY#YISPR.I                   | SLDNGGY#YISPR                   | 28.9  | 0 | 172 | 0 |
| Lyn | -0.27 | 3.924 | R.SLDNGGY#YISPR.I                   | SLDNGGY#YISPR                   | 28.9  | 0 | 172 | 0 |
| Lyn | -0.23 | 3.791 | R.SLDNGGY#YISPR.I                   | SLDNGGY#YISPR                   | 28.9  | 0 | 172 | 0 |
| Lyn | -0.25 | 3.479 | R.SLDNGGY#YISPR.I                   | SLDNGGY#YISPR                   | 26.4  | 0 | 172 | 0 |
| Lyn | -0.41 | 3.448 | R.SLDNGGY#YISPR.I                   | SLDNGGY#YISPR                   | 28.9  | 0 | 172 | 0 |
| Lyn | -0.35 | 3.356 | R.SLDNGGY#YISPR.I                   | SLDNGGY#YISPR                   | 26.4  | 0 | 172 | 0 |
| Lyn | 0.05  | 3.244 | R.SLDNGGY#YISPR.I                   | SLDNGGY#YISPR                   | 11.5  | 0 | 172 | 0 |
| Lyn | 0.08  | 3.243 | R.SLDNGGY#YISPR.I                   | SLDNGGY#YISPR                   | 28.9  | 0 | 172 | 0 |
| Lyn | 0.03  | 3.185 | R.SLDNGGY#YISPR.I                   | SLDNGGY#YISPR                   | 32.4  | 0 | 172 | 0 |
| Lyn | -0.37 | 3.181 | R.SLDNGGY#YISPR.I                   | SLDNGGY#YISPR                   | 21.5  | 0 | 172 | 0 |
| Lyn | -0.24 | 2.783 | R.SLDNGGY#YISPR.I                   | SLDNGGY#ISPR                    | 0     | 0 | 173 | 0 |
| Lyn | -0.21 | 2.358 | R.SLDNGGY#YISPR.I                   | SLDNGGY#YISPR                   | 7.4   | 0 | 172 | 0 |
| Lyn | -0.21 | 2.153 | R.SLDNGGY#YISPR.I                   | SLDNGGYY#ISPR                   | 0     | 0 | 173 | 0 |
| Lyn | 0.17  | 4.504 | R.VENCPDELY#DIM*K.M                 | VENCPDELY#DIM*K                 | 1000  | 0 | 452 | 0 |
| Lyn | 0.23  | 4.425 | R.VENCPDELY#DIM*K.M                 | VENCPDELY#DIM*K                 | 1000  | 0 | 452 | 0 |
| Lyn | 0.02  | 4.338 | R.VENCPDELY#DIM*K.M                 | VENCPDELY#DIM*K                 | 1000  | 0 | 452 | 0 |
| Lyn | 0.26  | 4.322 | R.VENCPDELY#DIM*K.M                 | VENCPDELY#DIM*K                 | 1000  | 0 | 452 | 0 |
| Lyn | 0.22  | 4.286 | R.VENCPDELY#DIM*K.M                 | VENCPDELY#DIM*K                 | 1000  | 0 | 452 | 0 |
| Lyn | 0.21  | 4.225 | R.VENCPDELY#DIM*K.M                 | VENCPDELY#DIM*K                 | 1000  | 0 | 452 | 0 |
| Lyn | 0.2   | 4.185 | R.VENCPDELY#DIM*K.M                 | VENCPDELY#DIM*K                 | 1000  | 0 | 452 | 0 |
| Lyn | 0.23  | 4.032 | R.VENCPDELY#DIM*K.M                 | VENCPDELY#DIM*K                 | 1000  | 0 | 452 | 0 |
| Lyn | 0.01  | 3.983 | R.VENCPDELY#DIM*K.M                 | VENCPDELY#DIM*K                 | 1000  | 0 | 452 | 0 |
| Lyn | 0.18  | 3.979 | R.VENCPDELY#DIM*K.M                 | VENCPDELY#DIM*K                 | 1000  | 0 | 452 | 0 |
| Lyn | 0.02  | 3.935 | R.VENCPDELY#DIM*K.M                 | VENCPDELY#DIM*K                 | 1000  | 0 | 452 | 0 |
| Lyn | 0.31  | 3.771 | R.VENCPDELY#DIM*K.M                 | VENCPDELY#DIM*K                 | 1000  | 0 | 452 | 0 |

|     |       |       |                         |                     |      |   |     |   |
|-----|-------|-------|-------------------------|---------------------|------|---|-----|---|
| Lyn | 0.64  | 3.899 | R.VENCPDELY#DIMK.M      | VENCPDELY#DIMK      | 1000 | 0 | 452 | 0 |
| Lyn | 0.65  | 3.878 | R.VENCPDELY#DIMK.M      | VENCPDELY#DIMK      | 1000 | 0 | 452 | 0 |
| Lyn | 0.64  | 3.867 | R.VENCPDELY#DIMK.M      | VENCPDELY#DIMK      | 1000 | 0 | 452 | 0 |
| Lyn | 0.63  | 3.791 | R.VENCPDELY#DIMK.M      | VENCPDELY#DIMK      | 1000 | 0 | 452 | 0 |
| Lyn | 0.59  | 3.764 | R.VENCPDELY#DIMK.M      | VENCPDELY#DIMK      | 1000 | 0 | 452 | 0 |
| Lyn | 0.57  | 3.711 | R.VENCPDELY#DIMK.M      | VENCPDELY#DIMK      | 1000 | 0 | 452 | 0 |
| Lyn | 0.64  | 3.631 | R.VENCPDELY#DIMK.M      | VENCPDELY#DIMK      | 1000 | 0 | 452 | 0 |
| Lyn | -0.15 | 3.615 | R.VENCPDELY#DIMK.M      | VENCPDELY#DIMK      | 1000 | 0 | 452 | 0 |
| Lyn | 0.57  | 3.485 | R.VENCPDELY#DIMK.M      | VENCPDELY#DIMK      | 1000 | 0 | 452 | 0 |
| Lyn | 0.59  | 3.417 | R.VENCPDELY#DIMK.M      | VENCPDELY#DIMK      | 1000 | 0 | 452 | 0 |
| Lyn | 0.64  | 3.408 | R.VENCPDELY#DIMK.M      | VENCPDELY#DIMK      | 1000 | 0 | 452 | 0 |
| Lyn | -0.14 | 3.321 | R.VENCPDELY#DIMK.M      | VENCPDELY#DIMK      | 1000 | 0 | 452 | 0 |
| Lyn | 0.57  | 3.248 | R.VENCPDELY#DIMK.M      | VENCPDELY#DIMK      | 1000 | 0 | 452 | 0 |
| Lyn | -0.02 | 3.141 | R.VENCPDELY#DIMK.M      | VENCPDELY#DIMK      | 1000 | 0 | 452 | 0 |
| Lyn | -0.45 | 3.402 | R.VIEDNEY#TAR.E         | VIEDNEY#TAR         | 28.9 | 0 | 390 | 0 |
| Lyn | -0.32 | 3.366 | R.VIEDNEY#TAR.E         | VIEDNEY#TAR         | 28.9 | 0 | 390 | 0 |
| Lyn | -0.7  | 3.338 | R.VIEDNEY#TAR.E         | VIEDNEY#TAR         | 28.9 | 0 | 390 | 0 |
| Lyn | -0.68 | 3.32  | R.VIEDNEY#TAR.E         | VIEDNEY#TAR         | 28.9 | 0 | 390 | 0 |
| Lyn | -0.67 | 3.286 | R.VIEDNEY#TAR.E         | VIEDNEY#TAR         | 26.4 | 0 | 390 | 0 |
| Lyn | -0.45 | 3.23  | R.VIEDNEY#TAR.E         | VIEDNEY#TAR         | 32.4 | 0 | 390 | 0 |
| Lyn | -0.32 | 3.23  | R.VIEDNEY#TAR.E         | VIEDNEY#TAR         | 22.9 | 0 | 390 | 0 |
| Lyn | -0.67 | 3.11  | R.VIEDNEY#TAR.E         | VIEDNEY#TAR         | 22.9 | 0 | 390 | 0 |
| Lyn | -0.69 | 3.07  | R.VIEDNEY#TAR.E         | VIEDNEY#TAR         | 26.4 | 0 | 390 | 0 |
| Lyn | -0.69 | 2.988 | R.VIEDNEY#TAR.E         | VIEDNEY#TAR         | 28.9 | 0 | 390 | 0 |
| Lyn | -0.69 | 2.903 | R.VIEDNEY#TAR.E         | VIEDNEY#TAR         | 20.4 | 0 | 390 | 0 |
| Lyn | -0.67 | 2.897 | R.VIEDNEY#TAR.E         | VIEDNEY#TAR         | 28.9 | 0 | 390 | 0 |
| Lyn | -0.67 | 2.832 | R.VIEDNEY#TAREGAK.F     | VIEDNEY#TAREGAK     | 21.5 | 0 | 390 | 0 |
| Srm | 0.9   | 5.654 | K.ASPETLSDQPWY#FSGVSR.T | ASPETLSDQPWY#FSGVSR | 57.8 | 0 | 121 | 0 |
| Srm | 0.86  | 5.576 | K.ASPETLSDQPWY#FSGVSR.T | ASPETLSDQPWY#FSGVSR | 57.8 | 0 | 121 | 0 |
| Srm | 0.87  | 5.44  | K.ASPETLSDQPWY#FSGVSR.T | ASPETLSDQPWY#FSGVSR | 57.8 | 0 | 121 | 0 |
| Srm | 0.92  | 5.429 | K.ASPETLSDQPWY#FSGVSR.T | ASPETLSDQPWY#FSGVSR | 57.8 | 0 | 121 | 0 |
| Srm | 0.62  | 5.322 | K.ASPETLSDQPWY#FSGVSR.T | ASPETLSDQPWY#FSGVSR | 57.8 | 0 | 121 | 0 |
| Srm | 0.66  | 5.275 | K.ASPETLSDQPWY#FSGVSR.T | ASPETLSDQPWY#FSGVSR | 57.8 | 0 | 121 | 0 |
| Srm | 0.62  | 5.106 | K.ASPETLSDQPWY#FSGVSR.T | ASPETLSDQPWY#FSGVSR | 52.8 | 0 | 121 | 0 |
| Srm | 0.66  | 4.936 | K.ASPETLSDQPWY#FSGVSR.T | ASPETLSDQPWY#FSGVSR | 57.8 | 0 | 121 | 0 |
| Srm | 0.81  | 4.638 | K.ASPETLSDQPWY#FSGVSR.T | ASPETLSDQPWY#FSGVSR | 30.8 | 0 | 121 | 0 |
| Srm | 0.59  | 4.602 | K.ASPETLSDQPWY#FSGVSR.T | ASPETLSDQPWY#FSGVSR | 37.4 | 0 | 121 | 0 |
| Srm | 0.68  | 4.484 | K.ASPETLSDQPWY#FSGVSR.T | ASPETLSDQPWY#FSGVSR | 57.8 | 0 | 121 | 0 |
| Srm | 0.7   | 4.183 | K.ASPETLSDQPWY#FSGVSR.T | ASPETLSDQPWY#FSGVSR | 42.6 | 0 | 121 | 0 |

|     |       |       |                           |                       |       |      |     |     |
|-----|-------|-------|---------------------------|-----------------------|-------|------|-----|-----|
| Srm | 0.3   | 3.959 | K.ASPETLSDQPWY#FSGVSR.T   | ASPETLSDQPWY#FSGVSR   | 24.8  | 0    | 121 | 0   |
| Srm | 0.99  | 3.951 | K.ASPETLSDQPWY#FSGVSR.T   | ASPETLSDQPWY#FSGVSR   | 49    | 0    | 121 | 0   |
| Srm | 0.39  | 3.592 | K.ASPETLSDQPWY#FSGVSR.T   | ASPETLSDQPWY#FSGVSR   | 30.7  | 0    | 121 | 0   |
| Srm | 0.1   | 3.052 | K.ASPETLSDQPWY#FSGVSR.T   | ASPETLSDQPWY#FSGVSR   | 20.2  | 0    | 121 | 0   |
| Srm | 0.21  | 2.915 | K.ASPETLSDQPWY#FSGVSR.T   | ASPETLSDQPWY#FSGVSR   | 12.7  | 0    | 121 | 0   |
| Srm | 0.08  | 3.004 | K.GRLFPGLEELLT#YK.A       | GRLFPGLEELLT#YK       | 10.3  | 0    | 195 | 0   |
| Srm | 0.26  | 2.934 | K.GRLFPGLEELLT#YK.A       | GRLFPGLEELLT#YK       | 10.3  | 0    | 196 | 0   |
| Srm | -0.06 | 2.263 | K.IPVKWT#APEAANY#R.V      | IPVKWT#APEAANY#R      | 1000  | 0    | 393 | 400 |
| Srm | -0.34 | 3.119 | K.IPVKWT#APEAANY#RVFSQK.S | IPVKWT#APEAANY#RVFSQK | 45.4  | 24.8 | 393 | 400 |
| Srm | 0.11  | 3.835 | K.IPVKWTAPEAANY#R.V       | IPVKWTAPEAANY#R       | 137.2 | 0    | 400 | 0   |
| Srm | 0.24  | 3.568 | K.IPVKWTAPEAANY#R.V       | IPVKWTAPEAANY#R       | 128.7 | 0    | 400 | 0   |
| Srm | 0.22  | 3.552 | K.IPVKWTAPEAANY#R.V       | IPVKWTAPEAANY#R       | 93.8  | 0    | 400 | 0   |
| Srm | 0.06  | 3.546 | K.IPVKWTAPEAANY#R.V       | IPVKWTAPEAANY#R       | 128.2 | 0    | 400 | 0   |
| Srm | -0.12 | 3.542 | K.IPVKWTAPEAANY#R.V       | IPVKWTAPEAANY#R       | 102.7 | 0    | 400 | 0   |
| Srm | -0.12 | 3.321 | K.IPVKWTAPEAANY#R.V       | IPVKWTAPEAANY#R       | 137.4 | 0    | 400 | 0   |
| Srm | 0.12  | 3.19  | K.IPVKWTAPEAANY#R.V       | IPVKWTAPEAANY#R       | 128.2 | 0    | 400 | 0   |
| Srm | 0.05  | 3.103 | K.IPVKWTAPEAANY#R.V       | IPVKWTAPEAANY#R       | 153.1 | 0    | 400 | 0   |
| Srm | -0.53 | 4.764 | K.IPVKWTAPEAANY#RVFSQK.S  | IPVKWTAPEAANY#RVFSQK  | 44.1  | 0    | 400 | 0   |
| Srm | -0.18 | 4.244 | K.IPVKWTAPEAANY#RVFSQK.S  | IPVKWTAPEAANY#RVFSQK  | 8     | 0    | 400 | 0   |
| Srm | -0.53 | 3.928 | K.IPVKWTAPEAANY#RVFSQK.S  | IPVKWTAPEAANY#RVFSQK  | 18.7  | 0    | 400 | 0   |
| Srm | 0     | 3.305 | K.WTAPEAANY#RVFSQK.S      | WTAPEAANY#RVFSQK      | 46.7  | 0    | 400 | 0   |
| Srm | 0.11  | 3.078 | K.WTAPEAANY#RVFSQK.S      | WTAPEAANY#RVFSQK      | 40.3  | 0    | 400 | 0   |
| Srm | 0     | 3.009 | K.WTAPEAANY#RVFSQK.S      | WTAPEAANY#RVFSQK      | 58.5  | 0    | 400 | 0   |
| Srm | 0.12  | 2.655 | K.WTAPEAANY#RVFSQK.S      | WTAPEAANY#RVFSQK      | 2     | 0    | 400 | 0   |
| Srm | 0.11  | 2.356 | K.WTAPEAANY#RVFSQK.S      | WTAPEAANY#RVFSQK      | 8.1   | 0    | 400 | 0   |
| Srm | 0.02  | 5.576 | R.LCALEEGGGY#IFAR.R       | LCALEEGGGY#IFAR       | 1000  | 0    | 87  | 0   |
| Srm | 0.15  | 5.19  | R.LCALEEGGGY#IFAR.R       | LCALEEGGGY#IFAR       | 1000  | 0    | 87  | 0   |
| Srm | 0.17  | 5.15  | R.LCALEEGGGY#IFAR.R       | LCALEEGGGY#IFAR       | 1000  | 0    | 87  | 0   |
| Srm | 0.04  | 4.939 | R.LCALEEGGGY#IFAR.R       | LCALEEGGGY#IFAR       | 1000  | 0    | 87  | 0   |
| Srm | -0.01 | 4.874 | R.LHAVCSGGEPVY#IVTELM*R.K | LHAVCSGGEPVY#IVTELM*R | 71.8  | 0    | 299 | 0   |
| Srm | 0.05  | 4.858 | R.LHAVCSGGEPVY#IVTELM*R.K | LHAVCSGGEPVY#IVTELM*R | 59.5  | 0    | 299 | 0   |
| Srm | 0.01  | 4.566 | R.LHAVCSGGEPVY#IVTELM*R.K | LHAVCSGGEPVY#IVTELM*R | 71.8  | 0    | 299 | 0   |
| Srm | 0.09  | 3.959 | R.LHAVCSGGEPVY#IVTELM*R.K | LHAVCSGGEPVY#IVTELM*R | 45    | 0    | 299 | 0   |
| Srm | 0.02  | 3.877 | R.LHAVCSGGEPVY#IVTELM*R.K | LHAVCSGGEPVY#IVTELM*R | 31.8  | 0    | 299 | 0   |
| Srm | 0.16  | 3.438 | R.LHAVCSGGEPVY#IVTELM*R.K | LHAVCSGGEPVY#IVTELM*R | 40.6  | 0    | 299 | 0   |
| Srm | -0.05 | 5.355 | R.LHAVCSGGEPVY#IVTELMR.K  | LHAVCSGGEPVY#IVTELMR  | 64.5  | 0    | 299 | 0   |
| Srm | 0.29  | 5.31  | R.LHAVCSGGEPVY#IVTELMR.K  | LHAVCSGGEPVY#IVTELMR  | 68.1  | 0    | 299 | 0   |
| Srm | 0.06  | 4.858 | R.LHAVCSGGEPVY#IVTELMR.K  | LHAVCSGGEPVY#IVTELMR  | 68.1  | 0    | 299 | 0   |
| Srm | 0.04  | 4.305 | R.LHAVCSGGEPVY#IVTELMR.K  | LHAVCSGGEPVY#IVTELMR  | 59.5  | 0    | 299 | 0   |

|     |       |       |                                        |                                    |      |      |     |     |
|-----|-------|-------|----------------------------------------|------------------------------------|------|------|-----|-----|
| Srm | 0.05  | 4.132 | R.LHAVCSGGEPVY#IVTELMR.K               | LHAVCSGGEPVY#IVTELMR               | 37.4 | 0    | 299 | 0   |
| Srm | 0.32  | 3.017 | R.LHAVCSGGEPVY#IVTELMR.K               | LHAVCSGGEPVY#IVTELMR               | 13.4 | 0    | 299 | 0   |
| Srm | 0.34  | 2.604 | R.LHAVCSGGEPVY#IVTELMRK.G              | LHAVCSGGEPVY#IVTELMRK              | 6.7  | 0    | 299 | 0   |
| Srm | -0.6  | 3.048 | R.LLKDDIY#SPSSSSKIPVK.W                | LLKDDIY#SPSSSSKIPVK                | 9.6  | 10.4 | 380 | 381 |
| Srm | -0.14 | 2.567 | R.LLKDDIY#SPSSSSKIPVK.W                | LLKDDIY#SPSSSSKIPVK                | 27.2 | 18.3 | 380 | 381 |
| Srm | -0.42 | 3.991 | R.LLKDDIY#SPSSSSKIPVK.W                | LLKDDIY#SPSSSSKIPVK                | 42.6 | 10.3 | 380 | 384 |
| Srm | -0.25 | 4.644 | R.LLKDDIY#SPSSSSK.I                    | LLKDDIY#SPSSSSK                    | 32.4 | 0    | 380 | 0   |
| Srm | -0.28 | 4.553 | R.LLKDDIY#SPSSSSK.I                    | LLKDDIY#SPSSSSK                    | 32.4 | 0    | 380 | 0   |
| Srm | -0.26 | 4.543 | R.LLKDDIY#SPSSSSK.I                    | LLKDDIY#SPSSSSK                    | 32.4 | 0    | 380 | 0   |
| Srm | -0.28 | 4.385 | R.LLKDDIY#SPSSSSK.I                    | LLKDDIY#SPSSSSK                    | 32.4 | 0    | 380 | 0   |
| Srm | -0.41 | 3.826 | R.LLKDDIY#SPSSSSK.I                    | LLKDDIY#SPSSSSK                    | 57.8 | 0    | 380 | 0   |
| Srm | 0.26  | 3.687 | R.LLKDDIY#SPSSSSK.I                    | LLKDDIY#SPSSSSK                    | 32.4 | 0    | 380 | 0   |
| Srm | 0.82  | 3.572 | R.LLKDDIY#SPSSSSK.I                    | LLKDDIY#SPSSSSK                    | 28.9 | 0    | 380 | 0   |
| Srm | 0.4   | 3.461 | R.LLKDDIY#SPSSSSK.I                    | LLKDDIY#SPSSSSK                    | 28.9 | 0    | 380 | 0   |
| Srm | -0.4  | 3.405 | R.LLKDDIY#SPSSSSK.I                    | LLKDDIY#SPSSSSK                    | 57.8 | 0    | 380 | 0   |
| Srm | -0.22 | 3.384 | R.LLKDDIY#SPSSSSK.I                    | LLKDDIY#SPSSSSK                    | 52.8 | 0    | 380 | 0   |
| Srm | -0.15 | 3.293 | R.LLKDDIY#SPSSSSK.I                    | LLKDDIY#SPSSSSK                    | 32.4 | 0    | 380 | 0   |
| Srm | 0.82  | 3.263 | R.LLKDDIY#SPSSSSK.I                    | LLKDDIY#SPSSSSK                    | 28.9 | 0    | 380 | 0   |
| Srm | -0.19 | 3.247 | R.LLKDDIY#SPSSSSK.I                    | LLKDDIY#SPSSSSK                    | 57.8 | 0    | 380 | 0   |
| Srm | 0.22  | 3.047 | R.LLKDDIY#SPSSSSK.I                    | LLKDDIY#SPSSSSK                    | 32.4 | 0    | 380 | 0   |
| Srm | 0.25  | 2.936 | R.LLKDDIY#SPSSSSK.I                    | LLKDDIY#SPSSSSK                    | 32.4 | 0    | 380 | 0   |
| Srm | -0.15 | 2.779 | R.LLKDDIY#SPSSSSK.I                    | LLKDDIY#SPSSSSK                    | 13.2 | 0    | 380 | 0   |
| Srm | -0.14 | 2.754 | R.LLKDDIY#SPSSSSK.I                    | LLKDDIY#SPSSSSK                    | 57.8 | 0    | 380 | 0   |
| Srm | -0.3  | 2.601 | R.LLKDDIY#SPSSSSK.I                    | LLKDDIY#SPSSSSK                    | 42.6 | 0    | 380 | 0   |
| Srm | -0.13 | 4.725 | R.LLKDDIY#SPSSSSKIPVK.W                | LLKDDIY#SPSSSSKIPVK                | 33.7 | 0    | 380 | 0   |
| Srm | -0.23 | 4.719 | R.LLKDDIY#SPSSSSKIPVK.W                | LLKDDIY#SPSSSSKIPVK                | 37.4 | 0    | 380 | 0   |
| Srm | -0.06 | 4.252 | R.LLKDDIY#SPSSSSKIPVK.W                | LLKDDIY#SPSSSSKIPVK                | 24.8 | 0    | 380 | 0   |
| Srm | -0.25 | 4.247 | R.LLKDDIY#SPSSSSKIPVK.W                | LLKDDIY#SPSSSSKIPVK                | 52.8 | 0    | 380 | 0   |
| Srm | -0.53 | 3.979 | R.LLKDDIY#SPSSSSKIPVK.W                | LLKDDIY#SPSSSSKIPVK                | 41.3 | 0    | 380 | 0   |
| Srm | -0.34 | 3.915 | R.LLKDDIY#SPSSSSKIPVK.W                | LLKDDIY#SPSSSSKIPVK                | 41.3 | 0    | 380 | 0   |
| Srm | -0.33 | 3.884 | R.LLKDDIY#SPSSSSKIPVK.W                | LLKDDIY#SPSSSSKIPVK                | 46.2 | 0    | 380 | 0   |
| Srm | -0.18 | 3.666 | R.LLKDDIY#SPSSSSKIPVK.W                | LLKDDIY#SPSSSSKIPVK                | 30.7 | 0    | 380 | 0   |
| Srm | 0.12  | 3.65  | R.LLKDDIY#SPSSSSKIPVK.W                | LLKDDIY#SPSSSSKIPVK                | 18.9 | 0    | 380 | 0   |
| Srm | -0.53 | 3.592 | R.LLKDDIY#SPSSSSKIPVK.W                | LLKDDIY#SPSSSSKIPVK                | 30.7 | 0    | 380 | 0   |
| Srm | 0.02  | 3.547 | R.LLKDDIY#SPSSSSKIPVK.W                | LLKDDIY#SPSSSSKIPVK                | 33.7 | 0    | 380 | 0   |
| Srm | 1.15  | 2.263 | R.TQAQQLLSPPNEPGAFLIRPSESS#LGGYSLSVR.A | TQAQQLLSPPNEPGAFLIRPSESS#LGGYSLSVR | 0    | 0    | 152 | 0   |
| Srm | 0.76  | 4.631 | R.TQAQQLLSPPNEPGAFLIRPSESSLGGY#SLSVR.A | TQAQQLLSPPNEPGAFLIRPSESSLGGY#SLSVR | 4.8  | 0    | 156 | 0   |
| Srm | 0.84  | 4.369 | R.TQAQQLLSPPNEPGAFLIRPSESSLGGY#SLSVR.A | TQAQQLLSPPNEPGAFLIRPSESSLGGY#SLSVR | 4.8  | 0    | 156 | 0   |
| Srm | 0.75  | 4.319 | R.TQAQQLLSPPNEPGAFLIRPSESSLGGY#SLSVR.A | TQAQQLLSPPNEPGAFLIRPSESSLGGY#SLSVR | 8.7  | 0    | 156 | 0   |

|     |       |       |                                        |                                    |       |   |     |   |
|-----|-------|-------|----------------------------------------|------------------------------------|-------|---|-----|---|
| Srm | 0.73  | 4.029 | R.TQAQQLLSPPNEPGAFLIRPSESSLGGY#SLSVR.A | TQAQQLLSPPNEPGAFLIRPSES#SLGGYSLSVR | 9.3   | 0 | 151 | 0 |
| Srm | 0.56  | 3.916 | R.TQAQQLLSPPNEPGAFLIRPSESSLGGY#SLSVR.A | TQAQQLLSPPNEPGAFLIRPSESSLGGY#SLSVR | 0     | 0 | 156 | 0 |
| Srm | 0.37  | 3.402 | R.TQAQQLLSPPNEPGAFLIRPSESSLGGY#SLSVR.A | TQAQQLLSPPNEPGAFLIRPSESSLGGY#SLSVR | 19.3  | 0 | 156 | 0 |
| Srm | 0.6   | 3.564 | R.TQAQQLLSPPNEPGAFLIRPSESSLGGYSLS#VR.A | TQAQQLLSPPNEPGAFLIRPSESS#LGGYSLSVR | 14.4  | 0 | 152 | 0 |
| Srm | 0.8   | 3.232 | R.TQAQQLLSPPNEPGAFLIRPSESSLGGYSLS#VR.A | TQAQQLLSPPNEPGAFLIRPSESSLGGYSLS#VR | 12.3  | 0 | 159 | 0 |
| Srm | 1.15  | 2.089 | R.TQAQQLLSPPNEPGAFLIRPSESSLGGYSLS#VR.A | TQAQQLLSPPNEPGAFLIRPSESSLGGYSLS#VR | 6.6   | 0 | 159 | 0 |
| Srm | -0.35 | 4.161 | R.VSM*AADGSLY#LQK.G                    | VSM*AADGSLY#LQK                    | 17    | 0 | 180 | 0 |
| Srm | -0.32 | 4.147 | R.VSM*AADGSLY#LQK.G                    | VSM*AADGSLY#LQK                    | 17    | 0 | 180 | 0 |
| Srm | -0.07 | 4.141 | R.VSM*AADGSLY#LQK.G                    | VSM*AADGSLY#LQK                    | 24.8  | 0 | 180 | 0 |
| Srm | -0.07 | 4.054 | R.VSM*AADGSLY#LQK.G                    | VSM*AADGSLY#LQK                    | 23.3  | 0 | 180 | 0 |
| Srm | -0.72 | 4.073 | R.VSMAADGSLY#LQK.G                     | VSMAADGSLY#LQK                     | 30.8  | 0 | 180 | 0 |
| Srm | -0.62 | 4.005 | R.VSMAADGSLY#LQK.G                     | VSMAADGSLY#LQK                     | 42.6  | 0 | 180 | 0 |
| Srm | -0.67 | 3.908 | R.VSMAADGSLY#LQK.G                     | VSMAADGSLY#LQK                     | 30.7  | 0 | 180 | 0 |
| Srm | -0.52 | 3.838 | R.VSMAADGSLY#LQK.G                     | VSMAADGSLY#LQK                     | 30.7  | 0 | 180 | 0 |
| Yes | -0.05 | 4.269 | K.FPIKWTAPEAALY#GR.F                   | FPIKWTAPEAALY#GR                   | 109.5 | 0 | 437 | 0 |
| Yes | -0.04 | 3.863 | K.FPIKWTAPEAALY#GR.F                   | FPIKWTAPEAALY#GR                   | 127.5 | 0 | 437 | 0 |
| Yes | 0.34  | 3.134 | K.WTAPEAALY#GR.F                       | WTAPEAALY#GR                       | 97.6  | 0 | 437 | 0 |
| Yes | 0.33  | 2.661 | K.WTAPEAALY#GR.F                       | WTAPEAALY#GR                       | 120   | 0 | 437 | 0 |
| Yes | 0.93  | 6.392 | R.AGPLAGGVTTFVALY#DYESR.T              | AGPLAGGVTTFVALY#DYESR              | 64.8  | 0 | 93  | 0 |
| Yes | 0.46  | 6.335 | R.AGPLAGGVTTFVALY#DYESR.T              | AGPLAGGVTTFVALY#DYESR              | 64.8  | 0 | 93  | 0 |
| Yes | 0.6   | 6.225 | R.AGPLAGGVTTFVALY#DYESR.T              | AGPLAGGVTTFVALY#DYESR              | 57.8  | 0 | 93  | 0 |
| Yes | 0.45  | 6.223 | R.AGPLAGGVTTFVALY#DYESR.T              | AGPLAGGVTTFVALY#DYESR              | 57.8  | 0 | 93  | 0 |
| Yes | 0.63  | 6.19  | R.AGPLAGGVTTFVALY#DYESR.T              | AGPLAGGVTTFVALY#DYESR              | 57.8  | 0 | 93  | 0 |
| Yes | 0.52  | 6.141 | R.AGPLAGGVTTFVALY#DYESR.T              | AGPLAGGVTTFVALY#DYESR              | 57.8  | 0 | 93  | 0 |
| Yes | 0.6   | 5.994 | R.AGPLAGGVTTFVALY#DYESR.T              | AGPLAGGVTTFVALY#DYESR              | 37.4  | 0 | 93  | 0 |
| Yes | 1     | 5.791 | R.AGPLAGGVTTFVALY#DYESR.T              | AGPLAGGVTTFVALY#DYESR              | 64.8  | 0 | 93  | 0 |
| Yes | 0.47  | 5.742 | R.AGPLAGGVTTFVALY#DYESR.T              | AGPLAGGVTTFVALY#DYESR              | 37.4  | 0 | 93  | 0 |
| Yes | 0.54  | 5.48  | R.AGPLAGGVTTFVALY#DYESR.T              | AGPLAGGVTTFVALY#DYESR              | 64.8  | 0 | 93  | 0 |
| Yes | 0.55  | 5.173 | R.AGPLAGGVTTFVALY#DYESR.T              | AGPLAGGVTTFVALY#DYESR              | 54.6  | 0 | 93  | 0 |
| Yes | 0.61  | 5.077 | R.AGPLAGGVTTFVALY#DYESR.T              | AGPLAGGVTTFVALY#DYESR              | 54.6  | 0 | 93  | 0 |
| Yes | 0.62  | 4.939 | R.AGPLAGGVTTFVALY#DYESR.T              | AGPLAGGVTTFVALY#DYESR              | 50.7  | 0 | 93  | 0 |
| Yes | 0.6   | 4.909 | R.AGPLAGGVTTFVALY#DYESR.T              | AGPLAGGVTTFVALY#DYESR              | 66.6  | 0 | 93  | 0 |
| Yes | 0.41  | 3.713 | R.LIEDNEY#TAR.Q                        | LIEDNEY#TAR                        | 28.9  | 0 | 417 | 0 |
| Yes | 0.41  | 3.513 | R.LIEDNEY#TAR.Q                        | LIEDNEY#TAR                        | 28.9  | 0 | 417 | 0 |
| Yes | 0.44  | 3.505 | R.LIEDNEY#TAR.Q                        | LIEDNEY#TAR                        | 28.9  | 0 | 417 | 0 |
| Yes | 0.44  | 3.458 | R.LIEDNEY#TAR.Q                        | LIEDNEY#TAR                        | 28.9  | 0 | 417 | 0 |
| Yes | 0.41  | 3.378 | R.LIEDNEY#TAR.Q                        | LIEDNEY#TAR                        | 24.4  | 0 | 417 | 0 |
| Yes | 0.68  | 4.332 | R.TQFNLSLQQLVAY#YSK.H                  | TQFNLSLQQLVAY#YSK                  | 32.4  | 0 | 232 | 0 |
