# Supplementary material
Source: PubMed Central journal article supplement (PMC4844773)
Supplement: NIHMS771282-supplement-Supp_Table_S2.pdf [file NIHMS771282-supplement-Supp_Table_S2.pdf]

## Weir *et al.* Supplementary Table 2

|     | Functionally well-characterized sites |      |       |      | Uncharacterized sites |     |       |      |       |      |       |     |
|-----|---------------------------------------|------|-------|------|-----------------------|-----|-------|------|-------|------|-------|-----|
|     | pY420                                 |      | pY531 |      | pY185                 |     | pY213 |      | pY214 |      | pY440 |     |
| Fyn | 18                                    | 3074 | 16    | 1038 | 1                     | 293 | 1     | 1792 | 1     | 670  | 0     | 532 |
| Src | 309                                   | 3079 | 119   | 968  | 0                     | 57  | -     | -    | 8     | 22   | 1     | 532 |
| Yes | 5                                     | 3074 | 4     | 1249 | 0                     | 352 | 0     | 1791 | 0     | 669  | 1     | 532 |
| Fgr | 1                                     | 202  | 1     | 170  | 0                     | 291 | 0     | 303  | 0     | 86   | -     | -   |
| Lyn | 17                                    | 2069 | 13    | 1576 | -                     | -   | 0     | 776  | 1     | 534  | -     | -   |
| Lck | 34                                    | 2983 | 36    | 813  | -                     | -   | -     | -    | 2     | 1067 | 0     | 44  |
| Hck | 4                                     | 2117 | 3     | 327  | 0                     | 1   | -     | -    | 0     | 424  | -     | -   |
| Frk | 1                                     | 67   | 2     | 504  | -                     | -   | -     | -    | -     | -    | -     | -   |
| Blk | 1                                     | 73   | 2     | 17   | -                     | -   | 0     | 146  | 0     | 97   | -     | -   |
| Srm | 1*                                    | 1*   | -     | -    | 1*                    | 1*  | -     | -    | 1*    | 1*   | 1*    | 1*  |
| Brk | 3                                     | 48   | 6     | 376  | 0                     | 340 | -     | -    | 0     | 0    | -     | -   |

**Supplementary Table 2.** PhosphositePlus-curated independent phosphorylation events on SFKs identified for residues homologous to the indicated tyrosine residues (at top) for human Fyn. For each site the left column (white) indicates the number of times the site was characterized, at least in part, in a small-scale study. The right columns (gray) indicate the number of times each site was identified in a large-scale phosphoproteomics study. A dash indicates that the site is not present in the indicated SFK. “\*” indicates as found in this study (not yet curated in PhosphositePlus).
