# Supplementary material
Source: PubMed Central journal article supplement (PMC4844773)
Supplement: NIHMS771282-supplement-Supp_Table_S3.pdf [file NIHMS771282-supplement-Supp_Table_S3.pdf]

**Weir et al. Supplementary Table 3.** A list of all human SH2 domains and the number of conserved tyrosines (equivalent to Fyn tyrosines 185, 213 and 214) they contain. "x" denotes the three SH2 tyrosines are not conserved. Also indicated are the number of these sites that have been found phosphorylated as curated by PhosphositePlus or as determined by this study. If the SH2 domain is within a gene that also encodes a kinase this is indicated. Totals are tabulated at the bottom of each column. SFKs are highlighted in blue.

| Protein | Sites Conserved | Sites in PhosphositePlus | Kinase |
|---------|-----------------|--------------------------|--------|
| STAT5A  | x               | x                        |        |
| STAT5B  | x               | x                        |        |
| STAT6   | x               | x                        |        |
| STAT1   | 1               | 0                        |        |
| STAT4   | 1               | 0                        |        |
| STAT3   | 1               | 0                        |        |
| STAT2   | 1               | 0                        |        |
| CBLC    | 1               | 0                        |        |
| CBLB    | 1               | 0                        |        |
| CBL     | 1               | 0                        |        |
| SH2D2A  | x               | x                        |        |
| HSH2    | 1               | 0                        |        |
| SH2D4A  | 2               | 0                        |        |
| SH2D4B  | 2               | 0                        |        |
| ZAP70_N | 2               | 2                        | 1      |
| SYK_N   | 1               | 1                        | 1      |
| JAK2    | 2               | 1                        | 1      |
| JAK3    | x               | x                        | 1      |
| TYK2    | x               | x                        | 1      |
| JAK1    | 1               | 0                        | 1      |
| CSK     | 1               | 0                        | 1      |
| MATK    | 1               | 0                        | 1      |
| ZAP70_C | 2               | 2                        | 1      |
| SYK_C   | 1               | 1                        | 1      |
| GRB14   | x               | x                        |        |
| GRB10   | x               | x                        |        |
| GRB7    | 1               | 0                        |        |
| YES     | 3               | 3                        | 1      |
| FYN     | 3               | 3                        | 1      |
| FGR     | 3               | 3                        | 1      |
| SRC1    | 2               | 2                        | 1      |
| HCK     | 2               | 2                        | 1      |
| LCK     | 1               | 1                        | 1      |
| LYN     | 2               | 2                        | 1      |
| BLK     | 2               | 2                        | 1      |
| FRK     | x               | x                        | 1      |

|          |   |   |   |
|----------|---|---|---|
| SLAP2    | 2 | 0 |   |
| SLAP     | 3 | 1 |   |
| ABL2     | 1 | 1 | 1 |
| ABL1     | 1 | 1 | 1 |
| SRMS     | 2 | 2 | 1 |
| SH2D5    | 1 | 0 |   |
| BRK      | 1 | 1 | 1 |
| GRB2     | 1 | 0 |   |
| GRAP     | 1 | 0 |   |
| GRAP2    | 1 | 0 |   |
| SHF      | 1 | 0 |   |
| SHB      | 2 | 0 |   |
| SHD      | 1 | 0 |   |
| SHE      | 2 | 0 |   |
| RIN3     | 1 | 0 |   |
| RIN2     | x | x |   |
| RIN1     | x | x |   |
| TENSIN   | 1 | 1 |   |
| TEM6     | 1 | 1 |   |
| TENC1    | 1 | 0 |   |
| CTEN     | x | x |   |
| CRK      | 1 | 1 |   |
| CRKL     | 1 | 1 |   |
| BRDG1    | 2 | 0 |   |
| BKS      | 1 | 0 |   |
| SUPT6H   | x | x |   |
| SH3BP2   | 1 | 0 |   |
| PLCG2_C  | 1 | 1 |   |
| PLCG1_C  | 1 | 1 |   |
| SOCS3    | x | x |   |
| SOCS1    | x | x |   |
| SOCS2    | 1 | 0 |   |
| CISH     | 1 | 0 |   |
| SOCS7    | 1 | 0 |   |
| SOCS4    | 1 | 0 |   |
| SOCS6    | 1 | 1 |   |
| SOCS5    | 1 | 0 |   |
| DAPP1    | 2 | 0 |   |
| NCK2     | 1 | 1 |   |
| NCK      | 1 | 1 |   |
| PTPN11_N | 2 | 2 |   |
| PTPN6_N  | 1 | 1 |   |
| PTPN11_C | 1 | 1 |   |
| PTPN6_C  | 1 | 1 |   |
| PIK3R3_N | x | x |   |
| PIK3R1_N | 2 | 1 |   |
| PIK3R2_N | 2 | 1 |   |

|          |     |    |    |
|----------|-----|----|----|
| PIK3R3_C | 2   | 0  |    |
| PIK3R1_C | 2   | 1  |    |
| PIK3R2_C | 2   | 0  |    |
| VAV3     | 1   | 0  |    |
| VAV1     | x   | x  |    |
| VAV2     | 1   | 0  |    |
| FER      | x   | x  | 1  |
| FES      | x   | x  | 1  |
| BCAR3    | x   | x  |    |
| SH2D3C   | x   | x  |    |
| SH2D3A   | x   | x  |    |
| SHCA     | x   | x  |    |
| SHCD     | x   | x  |    |
| SHCB     | x   | x  |    |
| SHCC     | x   | x  |    |
| APS      | x   | x  |    |
| SH2B     | x   | x  |    |
| LNK      | x   | x  |    |
| CHN2     | 1   | 0  |    |
| CHN1     | 1   | 0  |    |
| RASA1_N  | 1   | 0  |    |
| PLCG2_N  | 2   | 0  |    |
| PLCG1_N  | x   | x  |    |
| RASA1_C  | 1   | 0  |    |
| SHIP     | x   | x  |    |
| SHIP2    | x   | x  |    |
| SH2D1A   | 1   | 0  |    |
| EAT2     | x   | x  |    |
| MIST     | x   | x  |    |
| SLP76    | x   | x  |    |
| BLNK     | x   | x  |    |
| SLNK     | 1   | 0  |    |
| ITK      | 1   | 0  | 1  |
| BTK      | x   | x  | 1  |
| TEC      | x   | x  | 1  |
| TXK      | x   | x  | 1  |
| BMX      | 1   | 1  | 1  |
| Totals   | 111 | 49 | 30 |
