# Supplementary material
Source: PubMed Central journal article supplement (PMC4844773)
Supplement: NIHMS771282-supplement-SupplementalFigures1-7.pdf [file NIHMS771282-supplement-SupplementalFigures1-7.pdf]

# Supplementary Figure 1

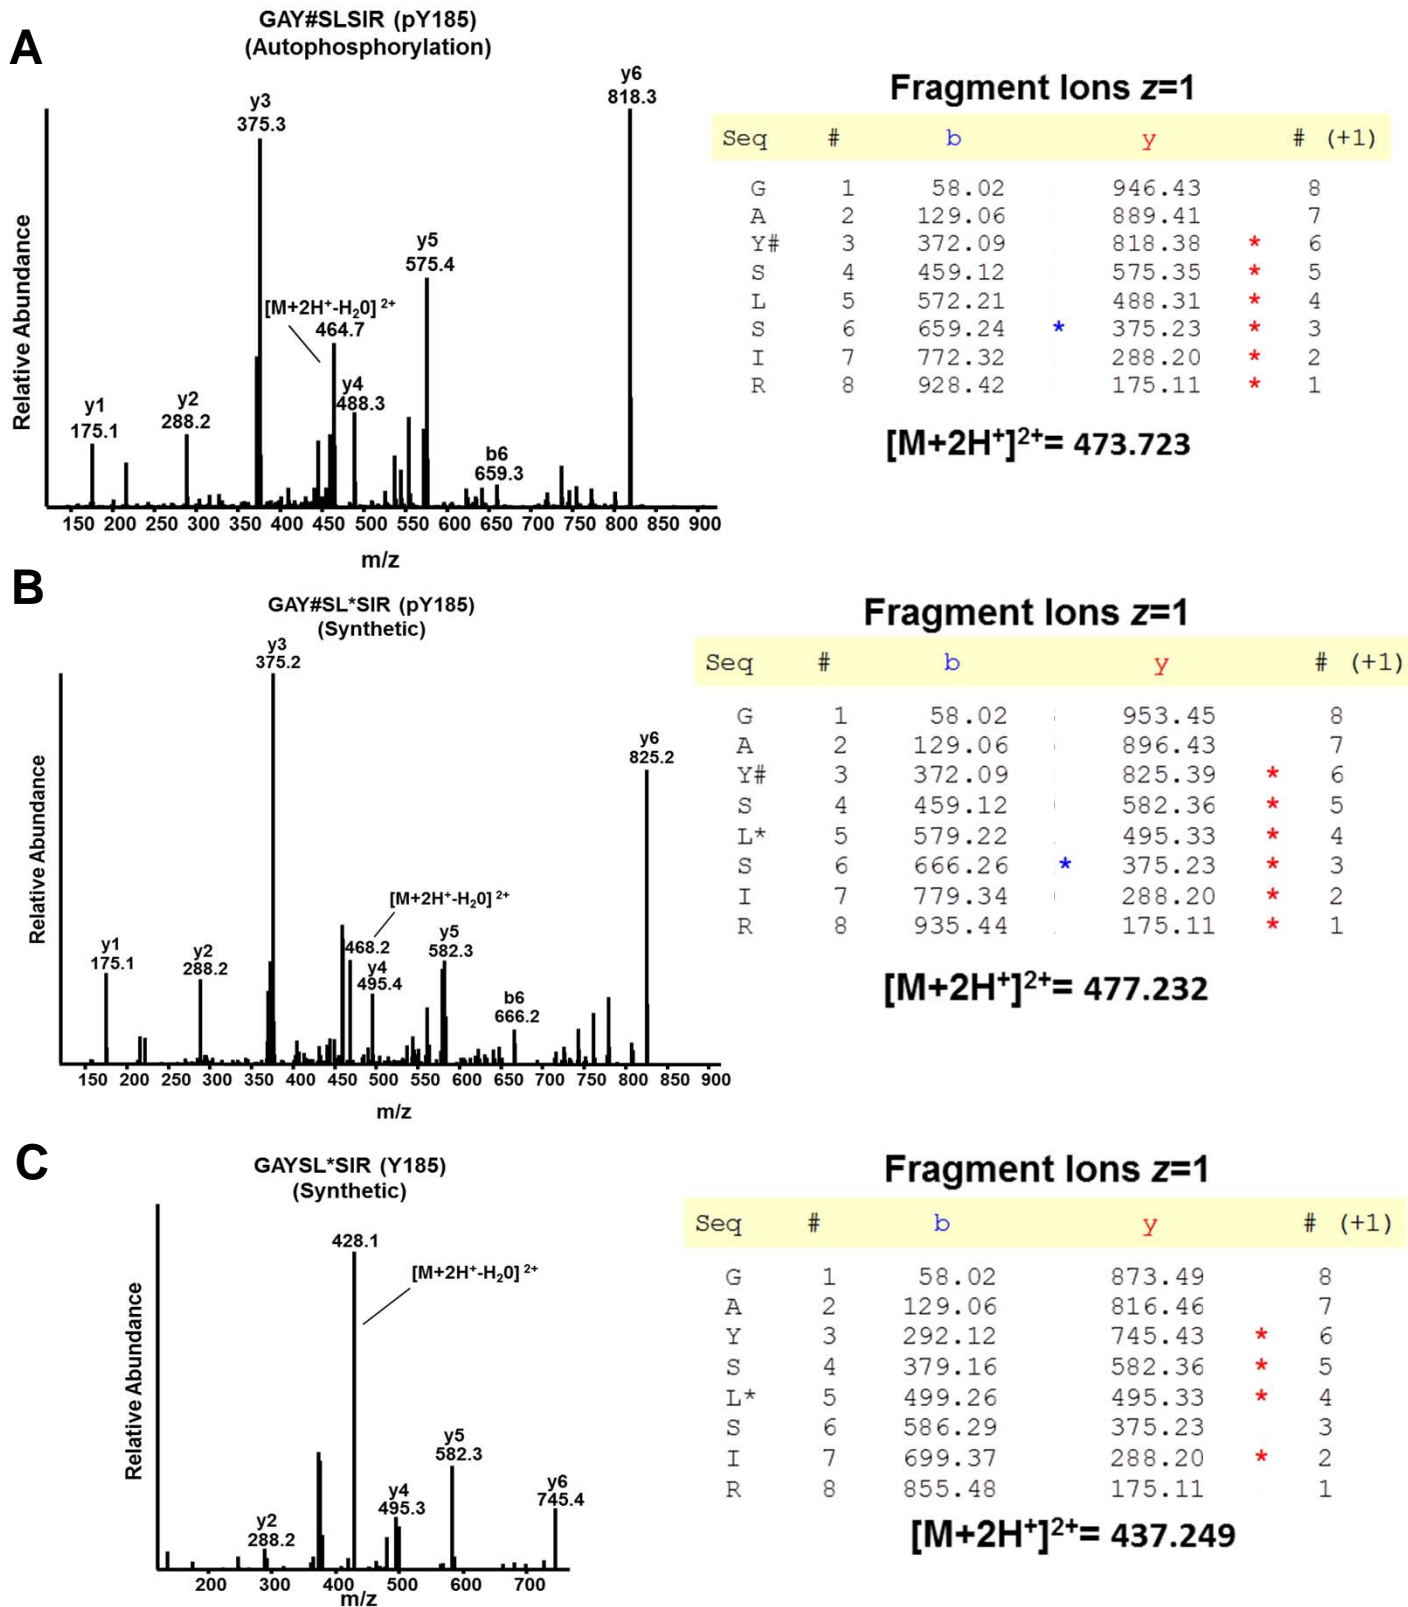

**Supplementary Figure 1.** Low-energy collision-induced dissociation spectra for (A) the phosphopeptide immunoprecipitated from yeast, (B) the synthetic phosphopeptide and (C) the synthetic unphosphorylated peptide. and their predicted fragment ions. # denotes phosphorylation, \* in sequence denotes residue containing <sup>13</sup>C and <sup>15</sup>N. Red and blue stars indicate select fragment ions specifically labeled in spectra.

# Supplementary Figure 2

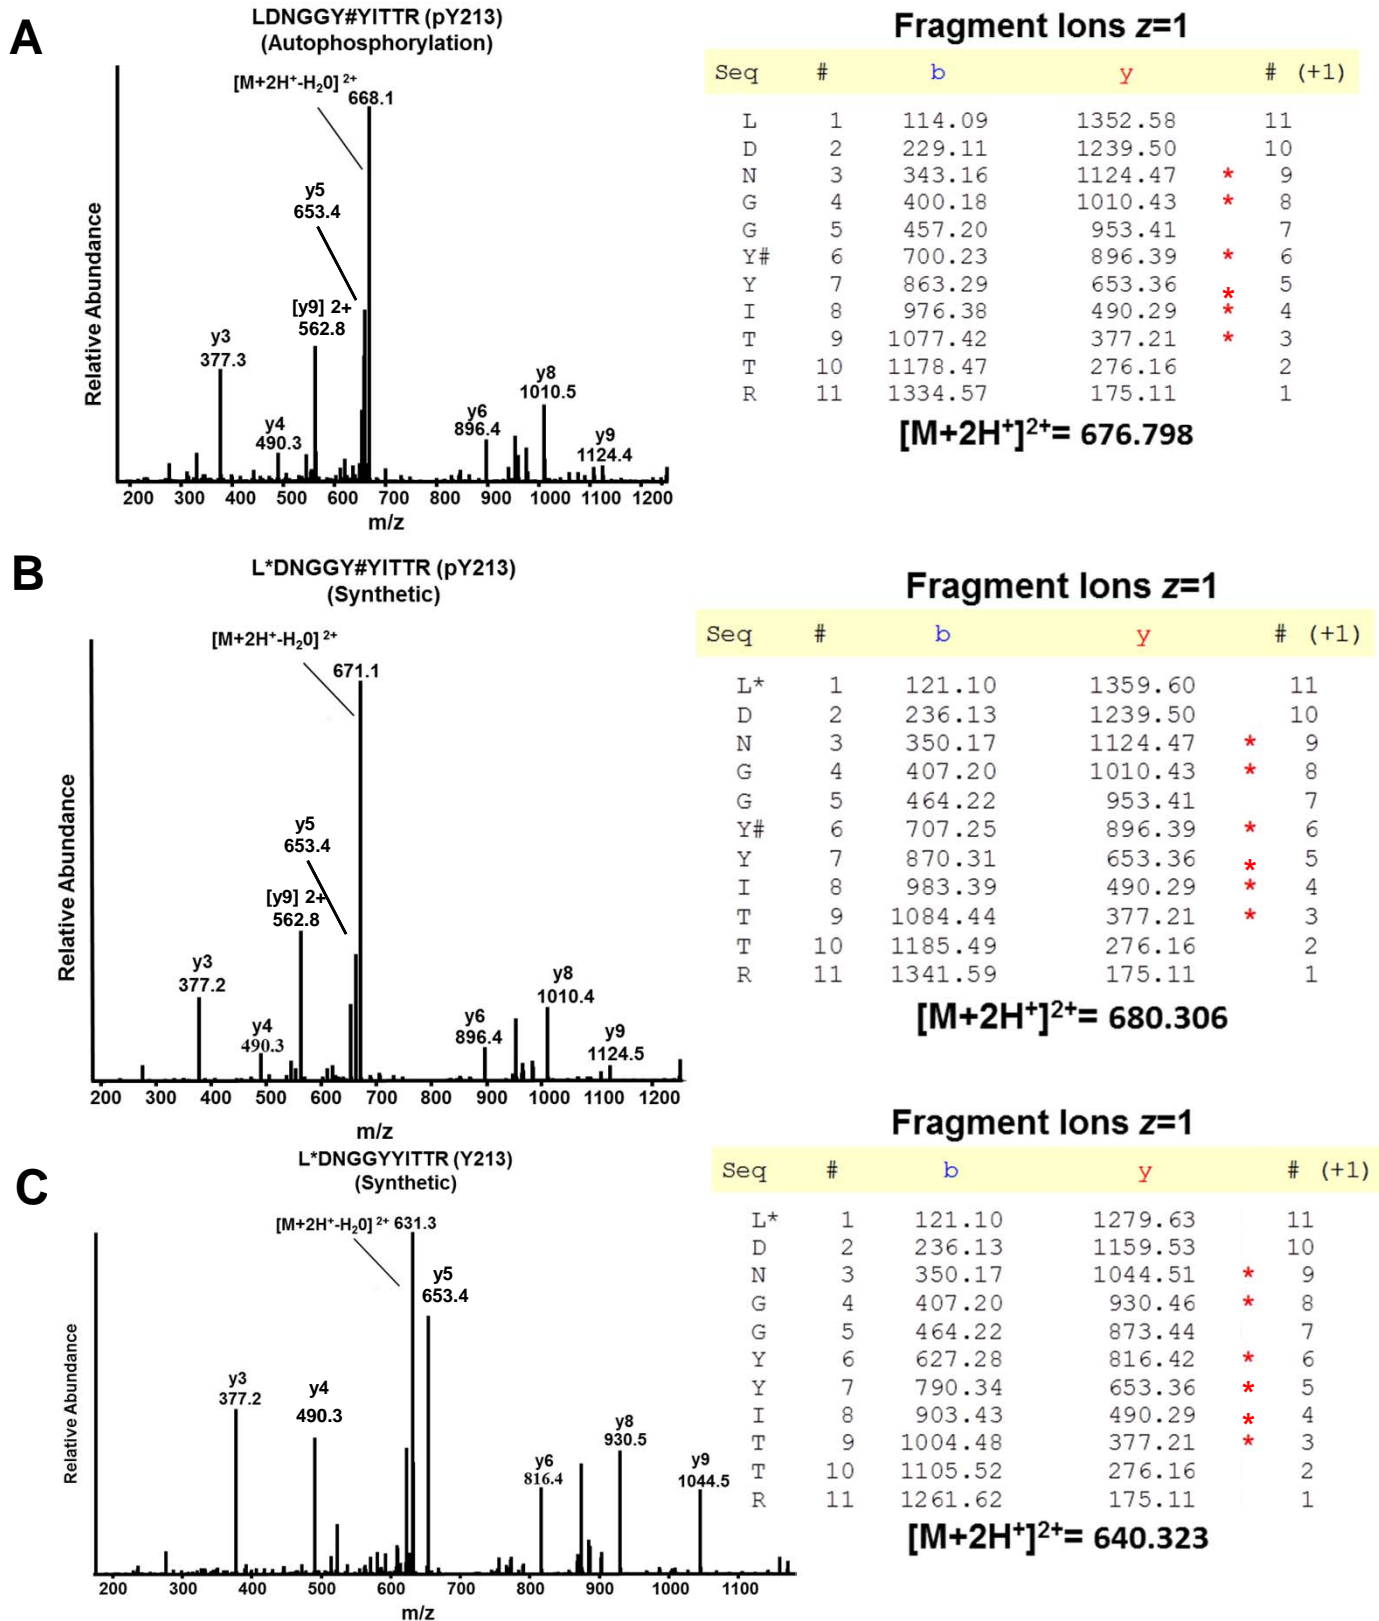

**Supplementary Figure 2.** Low-energy collision-induced dissociation spectra for (A) the phosphopeptide immunoprecipitated from yeast, (B) the synthetic phosphopeptide and (C) the synthetic unphosphorylated peptide. and their predicted fragment ions. # denotes phosphophorylation, \* in sequence denotes residue containing  $^{13}\text{C}$  and  $^{15}\text{N}$ . Red and blue stars indicate select fragment ions specifically labeled in spectra.

# Supplementary Figure 3

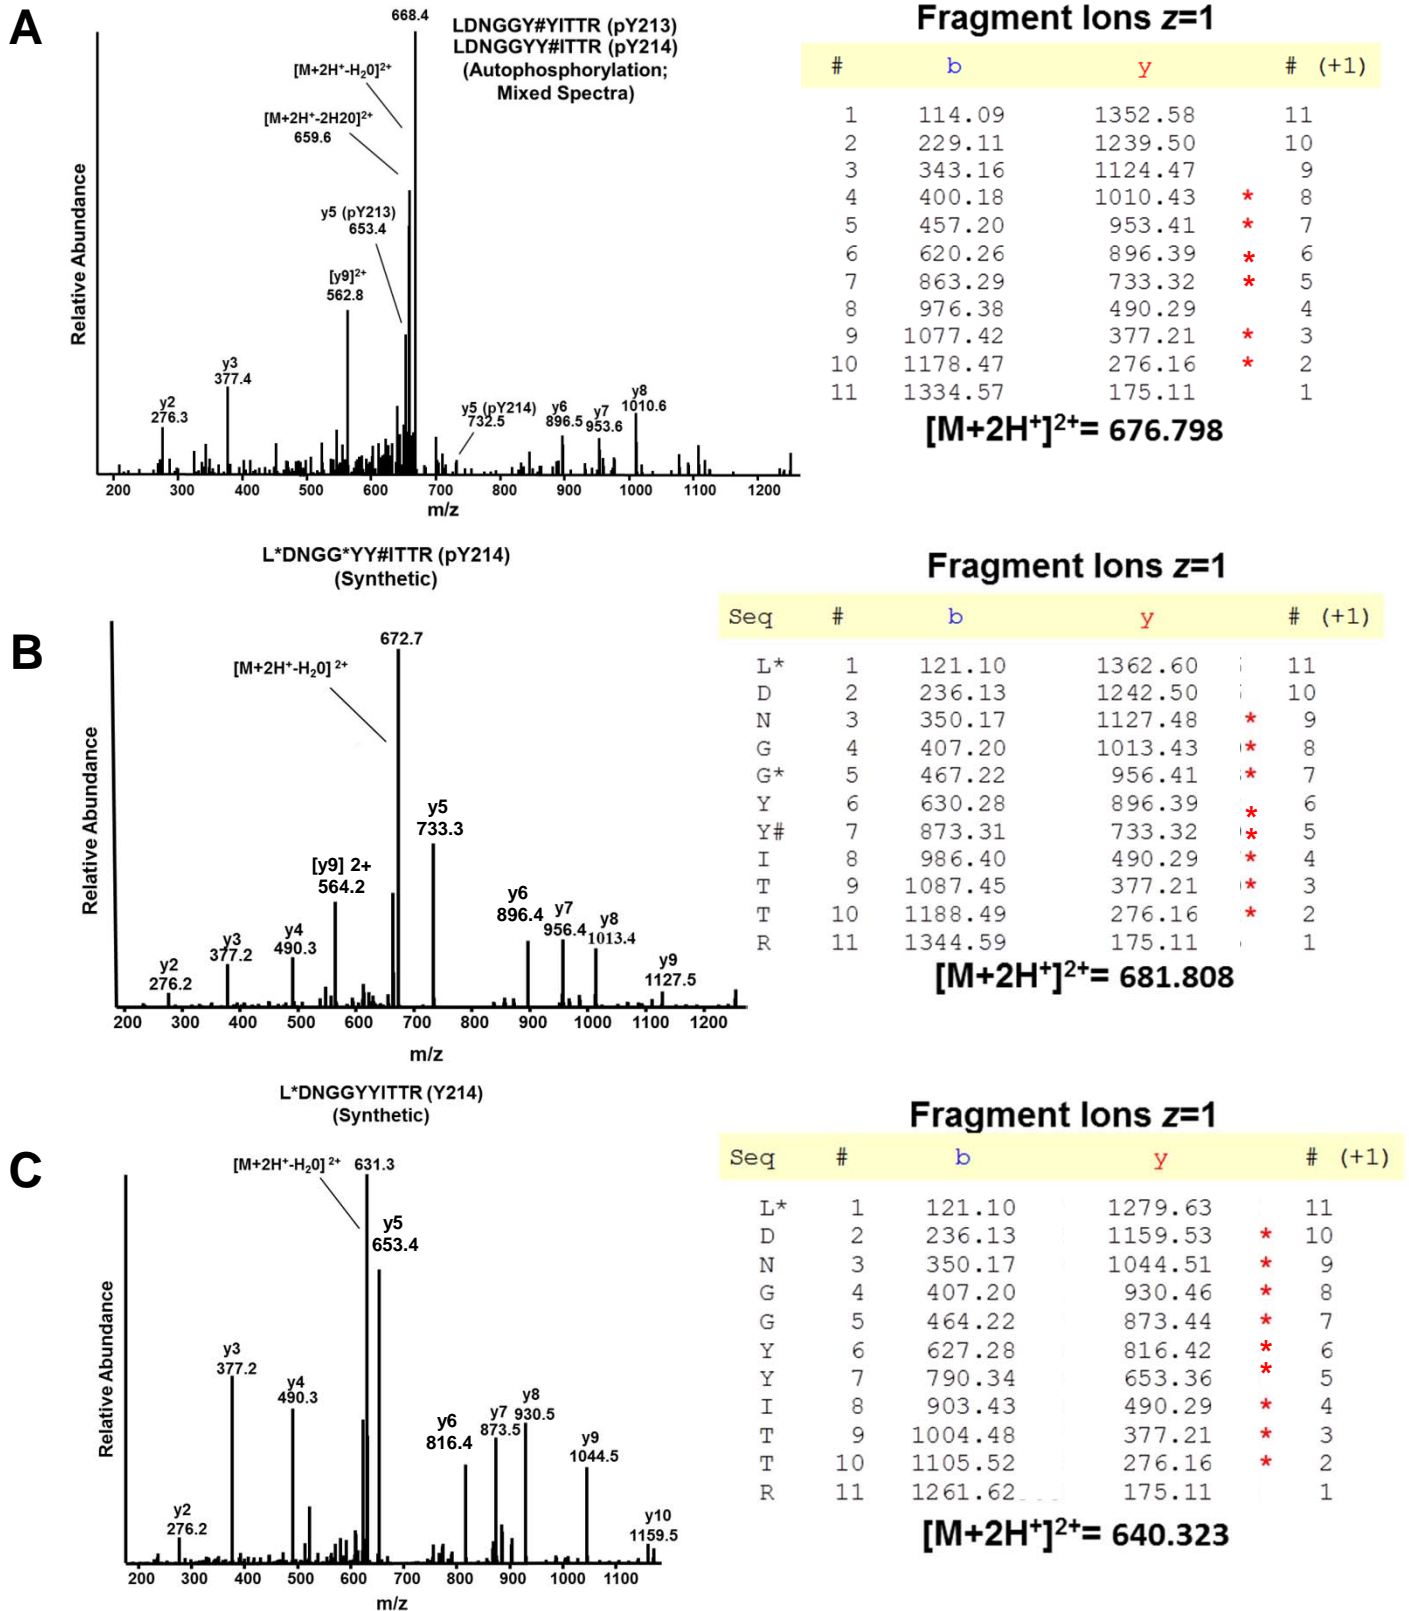

**Supplementary Figure 3.** Low-energy collision-induced dissociation spectra for (A) the co-eluting phosphopeptides immunoprecipitated from yeast, (B) the synthetic phosphopeptide and (C) the synthetic unphosphorylated peptide. and their predicted fragment ions. # denotes phosphorylation, \* in sequence denotes residue containing <sup>13</sup>C and <sup>15</sup>N. Red and blue stars indicate select fragment ions specifically labeled in spectra.

# Supplementary Figure 4

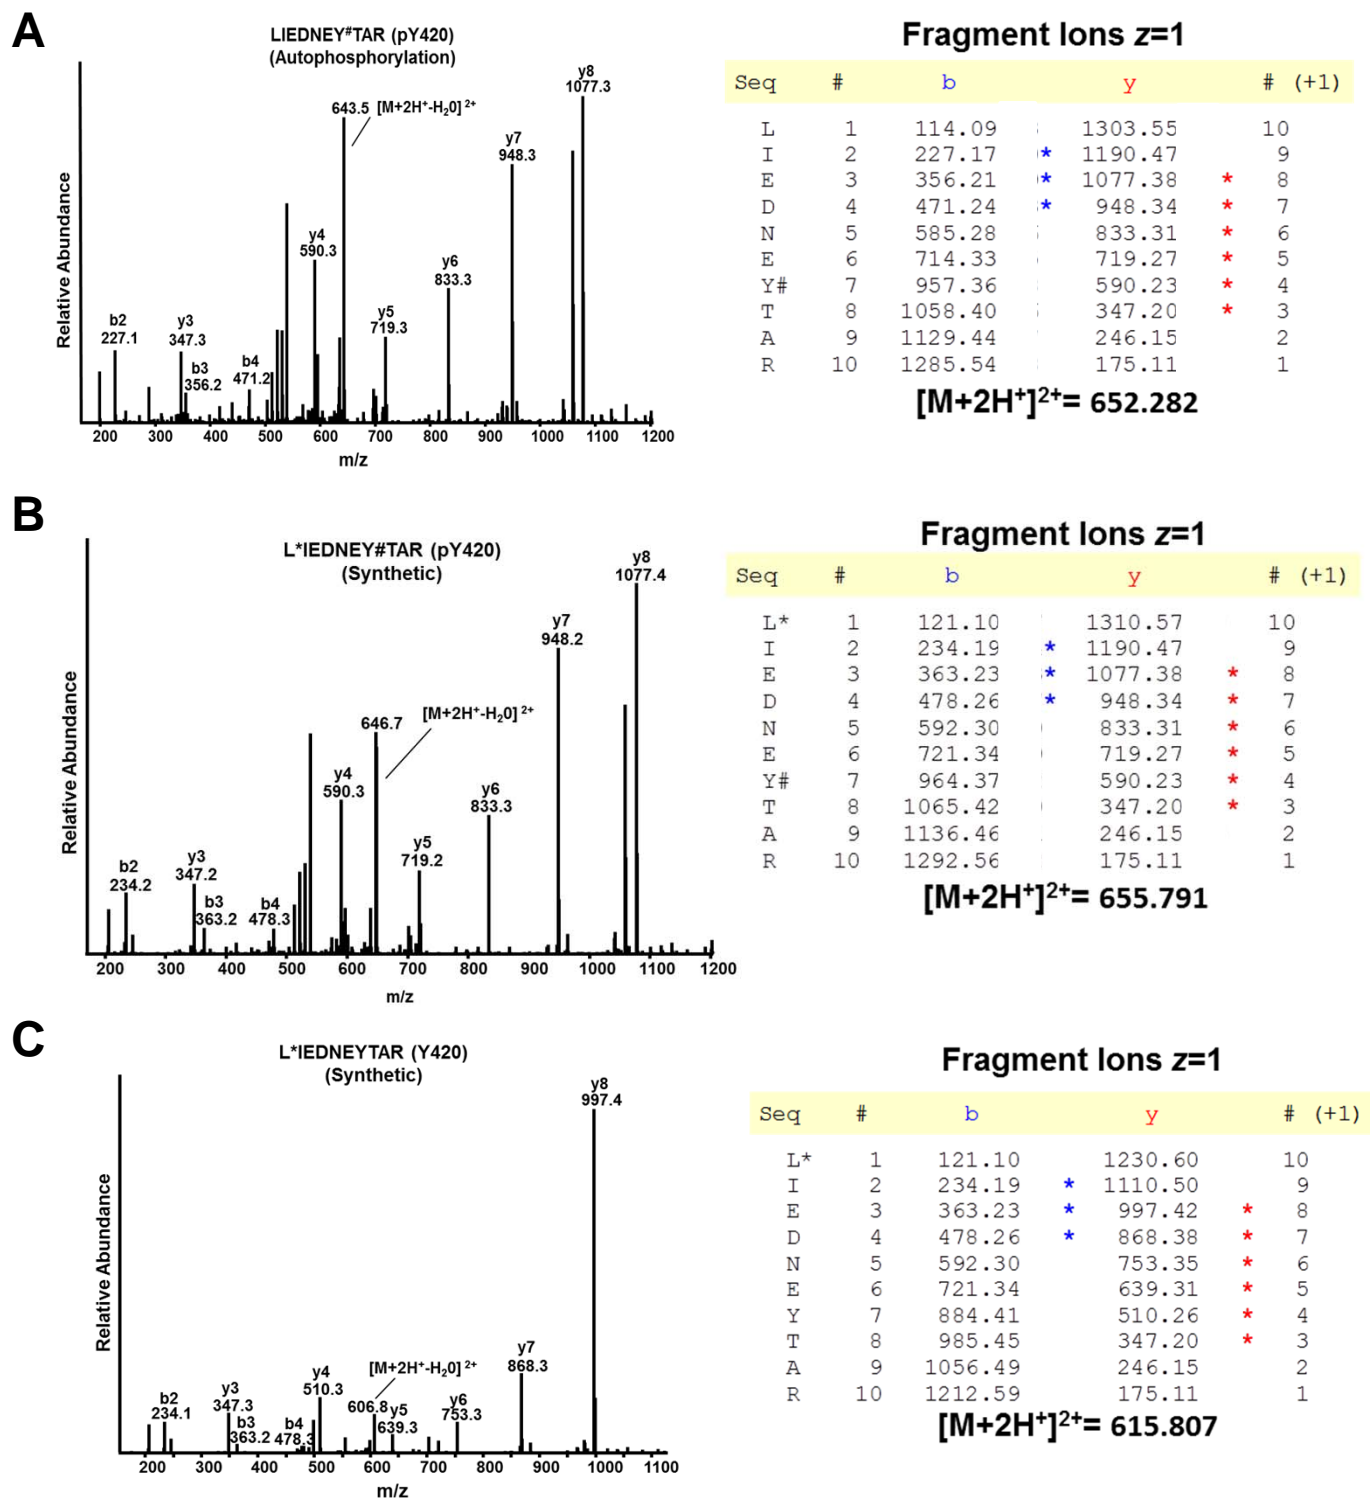

**Supplementary Figure 4.** Low-energy collision-induced dissociation spectra for (A) the phosphopeptide immunoprecipitated from yeast, (B) the synthetic phosphopeptide and (C) the synthetic unphosphorylated peptide. and their predicted fragment ions. # denotes phosphorylation, \* in sequence denotes residue containing <sup>13</sup>C and <sup>15</sup>N. Red and blue stars indicate select fragment ions specifically labeled in spectra.

## Supplementary Figure 5

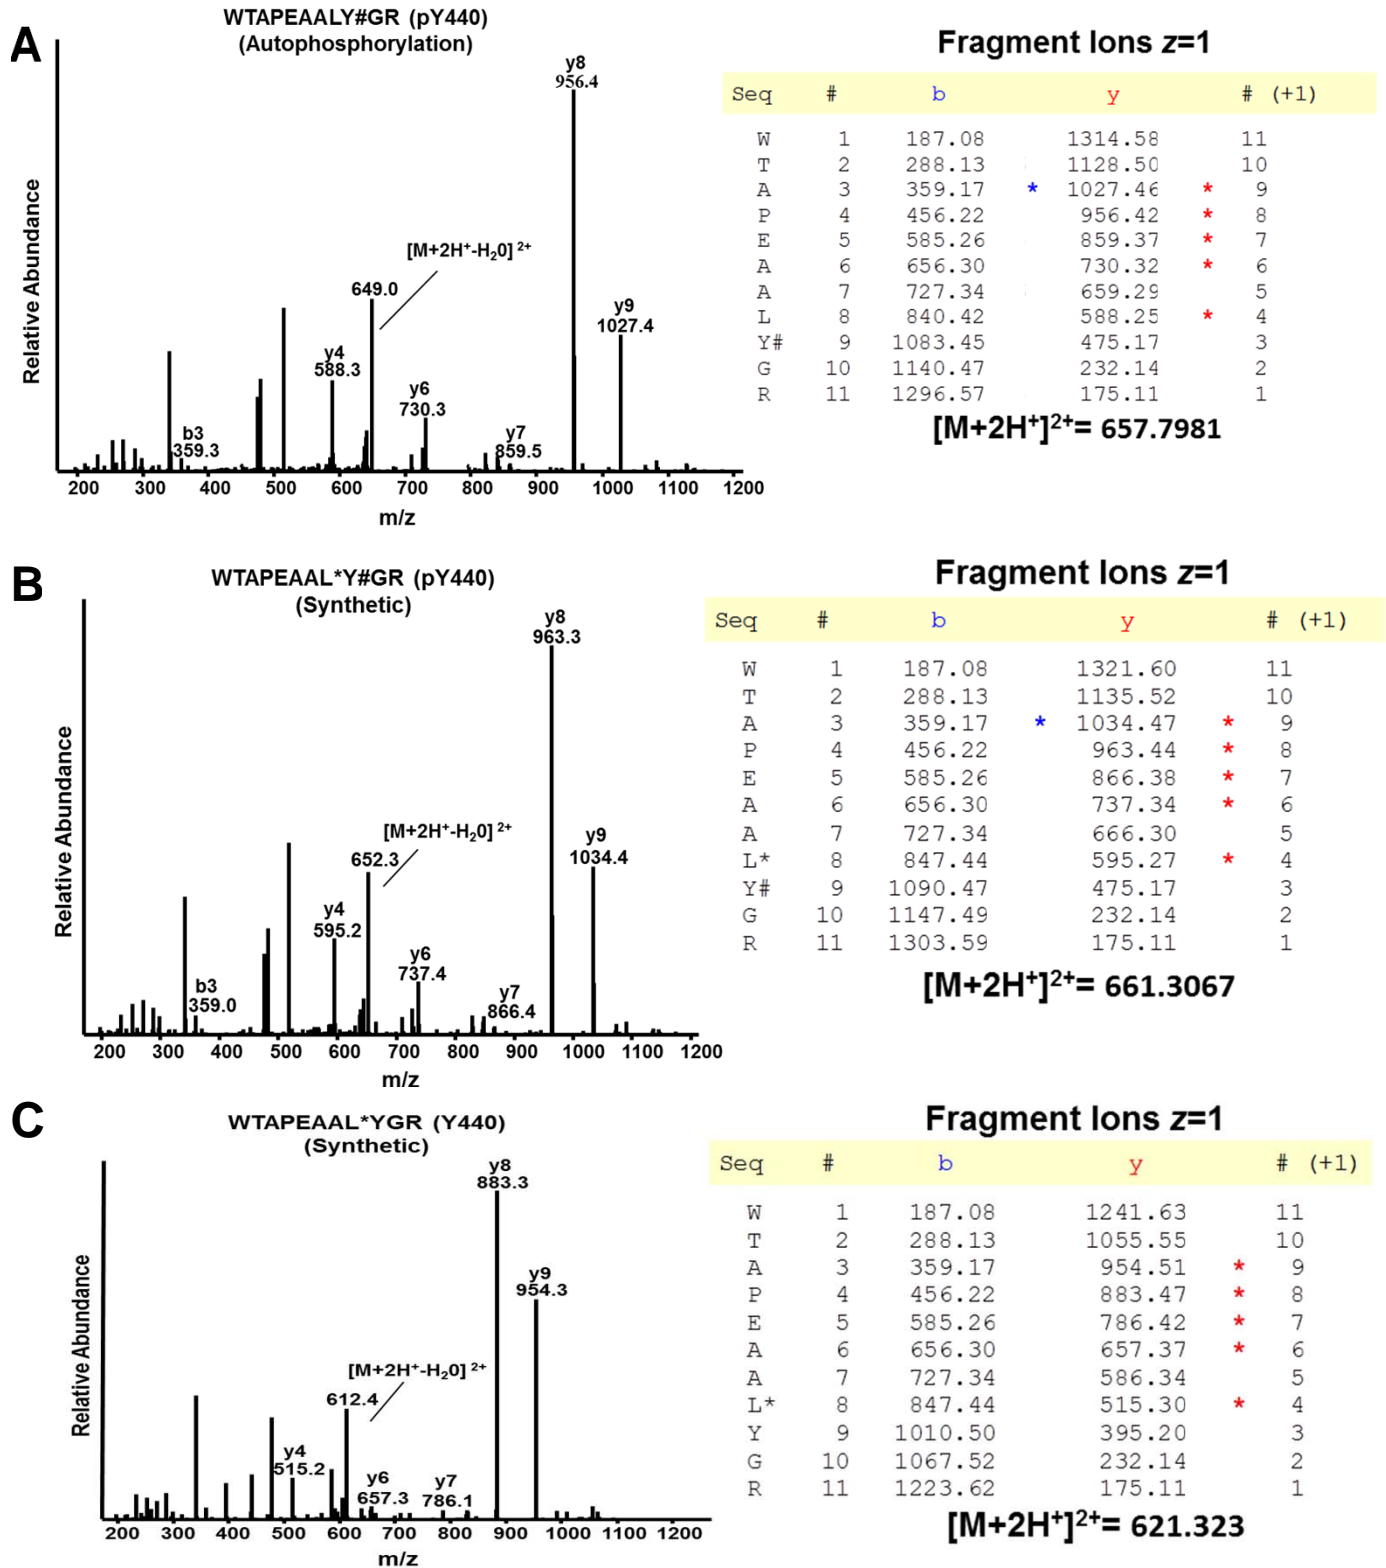

**Supplementary Figure 5.** Low-energy collision-induced dissociation spectra for (A) the phosphopeptide immunoprecipitated from yeast, (B) the synthetic phosphopeptide and (C) the synthetic unphosphorylated peptide. and their predicted fragment ions. # denotes phosphorylation, \* in sequence denotes residue containing  $^{13}\text{C}$  and  $^{15}\text{N}$ . Red and blue stars indicate select fragment ions specifically labeled in spectra.



# Weir *et al.* Supplementary Figure 6

**A**

|     |                                                                                                                                            |
|-----|--------------------------------------------------------------------------------------------------------------------------------------------|
| Yes | GIFLVRESE <sup>blue</sup> TTKGAY <sup>red</sup> SLSIRDWDEIRGDNVKHYKIRKLDN <sup>red</sup> GG <sup>yellow</sup> YYITTRAQF                    |
| Src | GTFLVRESE <sup>blue</sup> TTKGAY <sup>red</sup> CLSVSDFDNAKGLNVKHYKIRKLD <sup>red</sup> SGG <sup>yellow</sup> FYITSRTQF                    |
| Fyn | GTFLIRESE <sup>blue</sup> TTKGAY <sup>red</sup> SLSIRDWDDMKGDHVKHYKIRKLDN <sup>red</sup> GG <sup>yellow</sup> YYITTRAQF                    |
| Fgr | GAFLIRESE <sup>blue</sup> TTKGAY <sup>red</sup> SLSIRDWDQTRGDHVKHYKIRKLD <sup>red</sup> MGG <sup>yellow</sup> YYITTRVQF                    |
| Lyn | GAFLIRESE <sup>blue</sup> TLKGS <sup>yellow</sup> F <sup>red</sup> SLSVRDFDPVHGDVIKHYKIRSLDN <sup>red</sup> GG <sup>yellow</sup> YYISPRITF |
| Hck | GSFMIRDSE <sup>blue</sup> TTKGS <sup>yellow</sup> V <sup>red</sup> SLSVRDYDPRQGDTVKHYKIRTLDN <sup>red</sup> GG <sup>yellow</sup> FYISPRSTF |
| Lck | GSFLIRESE <sup>blue</sup> STAGS <sup>yellow</sup> F <sup>red</sup> SLSVRDFDQNQGEVVKHYKIRNLDN <sup>red</sup> GG <sup>yellow</sup> FYISPRITF |
| Blk | GSFLIRESE <sup>blue</sup> TNKGAF <sup>red</sup> SLSVKDVT-TQGELIKHYKIRCLDEGG <sup>yellow</sup> YYISPRITF                                    |
| Frk | GSFLIRESE <sup>blue</sup> SQKGE <sup>yellow</sup> F <sup>red</sup> SLSVLD-----GAVVKHYRIKRLDEGG <sup>yellow</sup> FFL <sup>red</sup> TRRRIF |
| Srm | GAFLIRPSE <sup>blue</sup> SSLGG <sup>yellow</sup> YSLSVR-----AQAKVCHYRVSMADGS <sup>yellow</sup> LYLQKGR <sup>red</sup> LF                  |
| Brk | GAFLIRVSE <sup>blue</sup> KPSADY <sup>red</sup> VLSVRD-----TQAVRHYKIWRRAGGR <sup>yellow</sup> LHLNEAVSF                                    |

**B**

|           |                                                                                                                             |
|-----------|-----------------------------------------------------------------------------------------------------------------------------|
| Hs_Fyn    | GTFLIRESE <sup>blue</sup> TTKGAY <sup>red</sup> SLSIRDWDDM-KGDHVKHYKIRKLDN-GG <sup>yellow</sup> YYITTRAQF                   |
| Mm_Fyn    | GTFLIRESE <sup>blue</sup> TTKGAY <sup>red</sup> SLSIRDWDDM-KGDHVKHYKIRKLDN-GG <sup>yellow</sup> YYITTRAQF                   |
| Rn_Fyn    | GTFLIRESE <sup>blue</sup> TTKGAY <sup>red</sup> SLSIRDWDDM-KGDHVKHYKIRKLDN-GG <sup>yellow</sup> YYITTRAQF                   |
| Gg_Fyn    | GTFLIRESE <sup>blue</sup> TTKGAY <sup>red</sup> SLSIRDWDDM-KGDHVKHYKIRKLDN-GG <sup>yellow</sup> YYITTRAQF                   |
| Xt_Fyn    | GTYLIRESE <sup>blue</sup> TTKGAY <sup>red</sup> SLSIRDWDDM-KGDHVKHYKIRKLDN-GG <sup>yellow</sup> YYITTRAQF                   |
| Dr_Fyn    | GTFLIRESE <sup>blue</sup> TTKGAY <sup>red</sup> SLSIQDWD <sup>red</sup> ET-KGDHVKHYKIRKLDN-GG <sup>yellow</sup> YYITTRAQF   |
| Ce_Src1   | GTFLIREREADTREF <sup>yellow</sup> ALTIRD <sup>red</sup> TDDQRNGGTVKHYKIRLDHDQGY <sup>yellow</sup> FIT <sup>red</sup> TRRTF  |
| Dm_Src64B | GTFLVRPSEHNPNGY <sup>yellow</sup> SLSVKDWEDGR-GYHVKHYRIKPLDN-GG <sup>yellow</sup> YYIATNQT <sup>red</sup> F                 |
| Ce_Src2   | GAFLVRDSESRQHDL <sup>red</sup> SLSVRE-----NDSVKHYRIRQLDH-GG <sup>yellow</sup> YFIARRRPF                                     |
| Dm_SRC42  | GAFLIRDSESRHNDY <sup>red</sup> SLSVRD-----GDTVKHYRIRQLDE-GG <sup>yellow</sup> FFIARRTTF                                     |
| Sl_Srk1   | GSFLIRDSE <sup>blue</sup> TTPGDF <sup>yellow</sup> SLSVKD-----QDRVRHYRVRRL <sup>red</sup> ED-GS <sup>yellow</sup> LFVTRRSTF |
| Sl_Srk4   | GSFLIRSD <sup>blue</sup> TTPGDF <sup>yellow</sup> SLSVRD-----IDRVRHYRIKKLEN-GTY <sup>yellow</sup> FVTRRLTF                  |

**Supplementary Figure 6.** Multiple sequence alignment of the region of the SH2 domain harboring the equivalents of Tyr185, Tyr213 and Tyr14 of human Fyn for (A) all human SFKs and (B) vertebrate Fyn orthologues (upper) and the SFKs found in worm (Ce), fly (Dm) and sponge (Sl). Hs=human, Mm=mouse, Rn=rat, Gg=chicken, Xt=frog and Dr=zebrafish. Blue highlight indicates the phosphotyrosine-interacting arginine. Red highlight indicates tyrosine residues and yellow highlight indicates non-tyrosine residues.

## Weir *et al.* Supplementary Figure 7

**A**

|     |                   |               |         |         |
|-----|-------------------|---------------|---------|---------|
| Yes | DFGLARLIE-DNE--Y  | TARQGAKFPIKWT | APEAALY | GRFTIK  |
| Src | DFGLARLIE-DNE--Y  | TARQGAKFPIKWT | APEAALY | GRFTIK  |
| Fyn | DFGLARLIE-DNE--Y  | TARQGAKFPIKWT | APEAALY | GRFTIK  |
| Fgr | DFGLARLIK-DDE--Y  | NPCQGSKFPIKWT | APEAALF | GRFTIK  |
| Lyn | DFGLARVIE-DNE--Y  | TAREGAKFPIKWT | APEAINF | GCFTIK  |
| Hck | DFGLARVIE-DNE--Y  | TAREGAKFPIKWT | APEAINF | GSFTIK  |
| Lck | DFGLARLIE-DNE--Y  | TAREGAKFPIKWT | APEAINY | GTFTIK  |
| Blk | DFGLARIID-S-E--Y  | TAQEGAKFPIKWT | APEAIHF | GVFTIK  |
| Frk | DFGLARVFKVDNEDIY  | ESRHEIKLPVKWT | APEAIRS | SNKFSIK |
| Srm | DFGLARLLK---DDIY  | SPSSSKIPVKWT  | APEAANY | RVFSQK  |
| Brk | DFGLARLIK---EDVY- | LSHDHNIPYKWT  | APEALS  | RGHYSTK |

**B**

|           |                |               |         |         |
|-----------|----------------|---------------|---------|---------|
| Hs_Fyn    | DFGLARL-IEDNEY | TARQGAKFPIKWT | APEAALY | GRFTIK  |
| Mm_Fyn    | DFGLARL-IEDNEY | TARQGAKFPIKWT | APEAALY | GRFTIK  |
| Rn_Fyn    | DFGLARL-IEDNEY | TARQGAKFPIKWT | APEAALY | GRFTIK  |
| Gg_Fyn    | DFGLARL-IEDNEY | TARQGAKFPIKWT | APEAALY | GRFTIK  |
| Xt_Fyn    | DFGLARL-IEDNEY | TARQGMKFPIKWT | APEAALY | GRFTIK  |
| Dr_Fyn    | DFGLARL-IEDNEY | TARQGAKFPIKWT | APEAALY | GRFTIK  |
| Ce_Src1   | DFGLARKLMEEDIY | EARTGAKFPIKWT | APEAAT  | CGNFTVK |
| Dm_Src64B | DFGLARV-IADDEY | CPKQGSRFPVKWT | APEAIIY | GKFSIK  |
| Ce_Src2   | DFGLARILMKENEY | EARTGARFPIKWT | APEAANY | NRFTTK  |
| Dm_SRC42  | DFGLARV-IKEDEY | EARVGARFPIKWT | APEAANY | SKFSIK  |
| Sl_Srk1   | DFGLARV-IDEEIY | EAHTGAKFPIKWT | APEAAMY | NRFTIK  |
| Sl_Srk4   | DFGLARV-IDEEIY | EAKLGAKFPIKWT | APEAAMY | SRFTIK  |

**Supplementary Figure 7.** Multiple sequence alignment of the activation loop region of the kinase domain harboring the equivalent of Tyr420 (green highlight) of human Fyn for (A) all human SFKs and (B) vertebrate Fyn orthologues (upper) and the SFKs found in worm (Ce), fly (Dm) and sponge (Sl). Hs=human, Mm=mouse, Rn=rat, Gg=chicken, Xt=frog and Dr=zebrafish. Blue highlight indicates the conserved activation loop features. Red highlight indicates tyrosine residues and yellow highlight indicates non-tyrosine residues.
